# Supplementary material
Source: PubMed Central journal article supplement (PMC7854864)
Supplement: NIHMS1628058-supplement-Data_S1.pdf [file NIHMS1628058-supplement-Data_S1.pdf]

# NMR Spectra

## 4-(acrylamidomethyl)benzoic acid

### <sup>1</sup>HMR

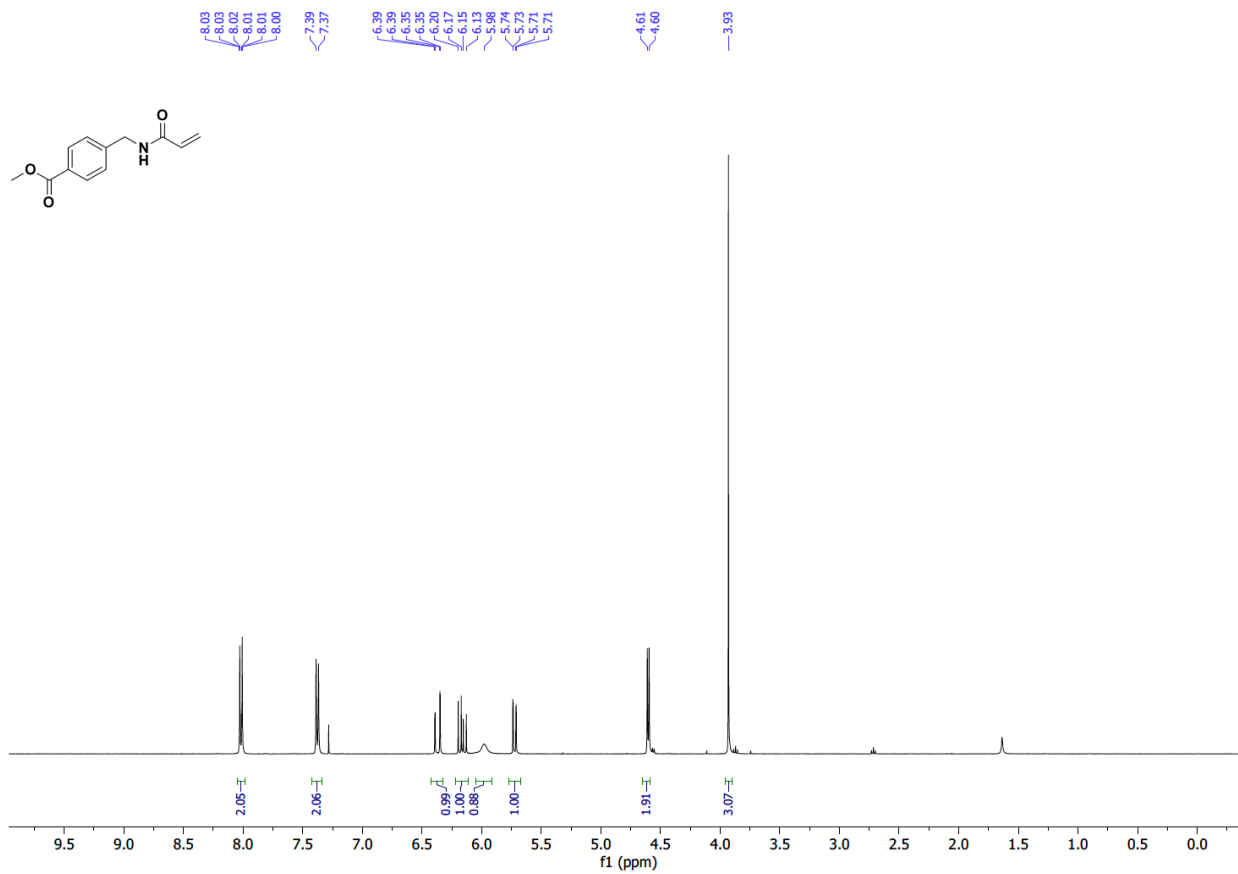

# 4-(acrylamidomethyl)-N-(2-(4-(2,2,2-trifluoroethoxy)phenoxy)phenyl)benzamide

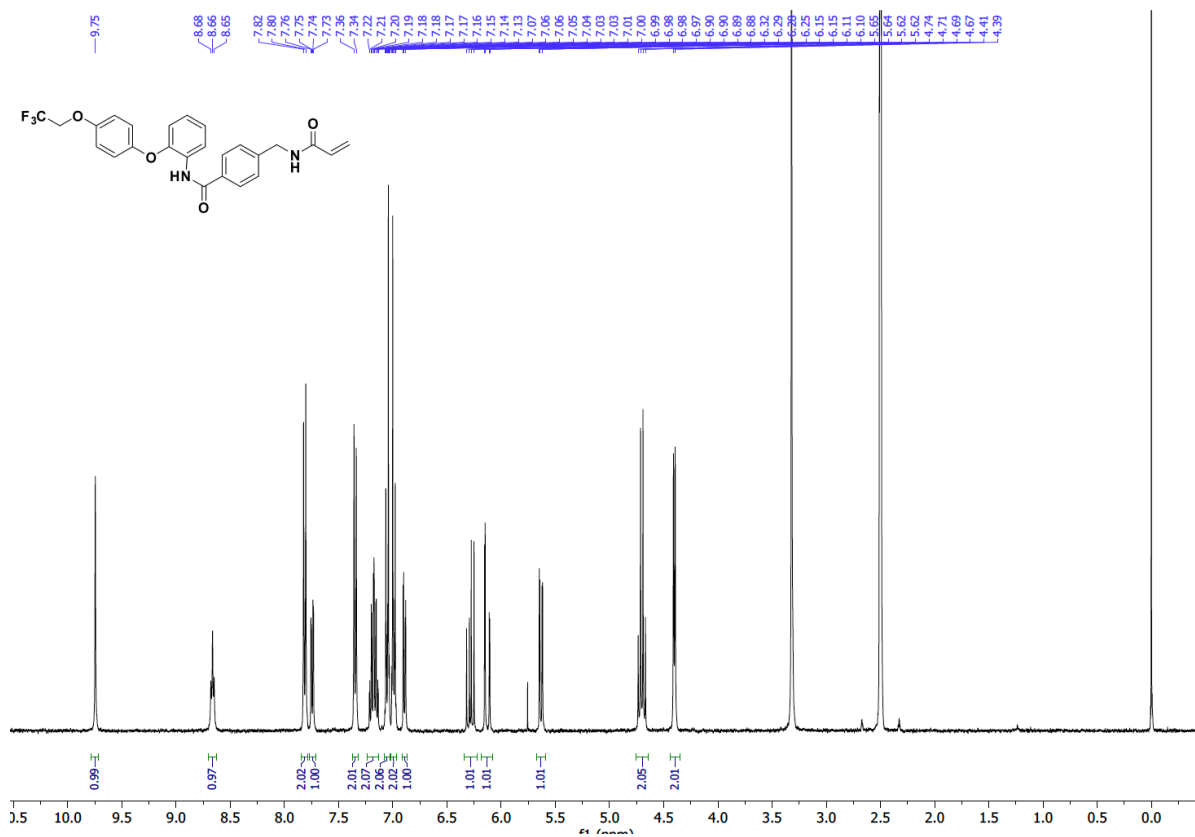

# 19F NMR

-72.89

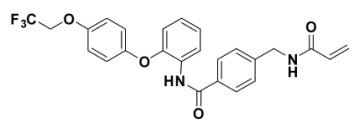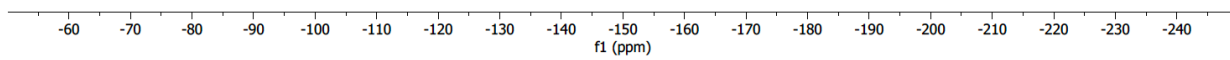

# 4-(acrylamidomethyl)-N-(2-phenoxyphenyl)benzamide

## <sup>1</sup>H NMR

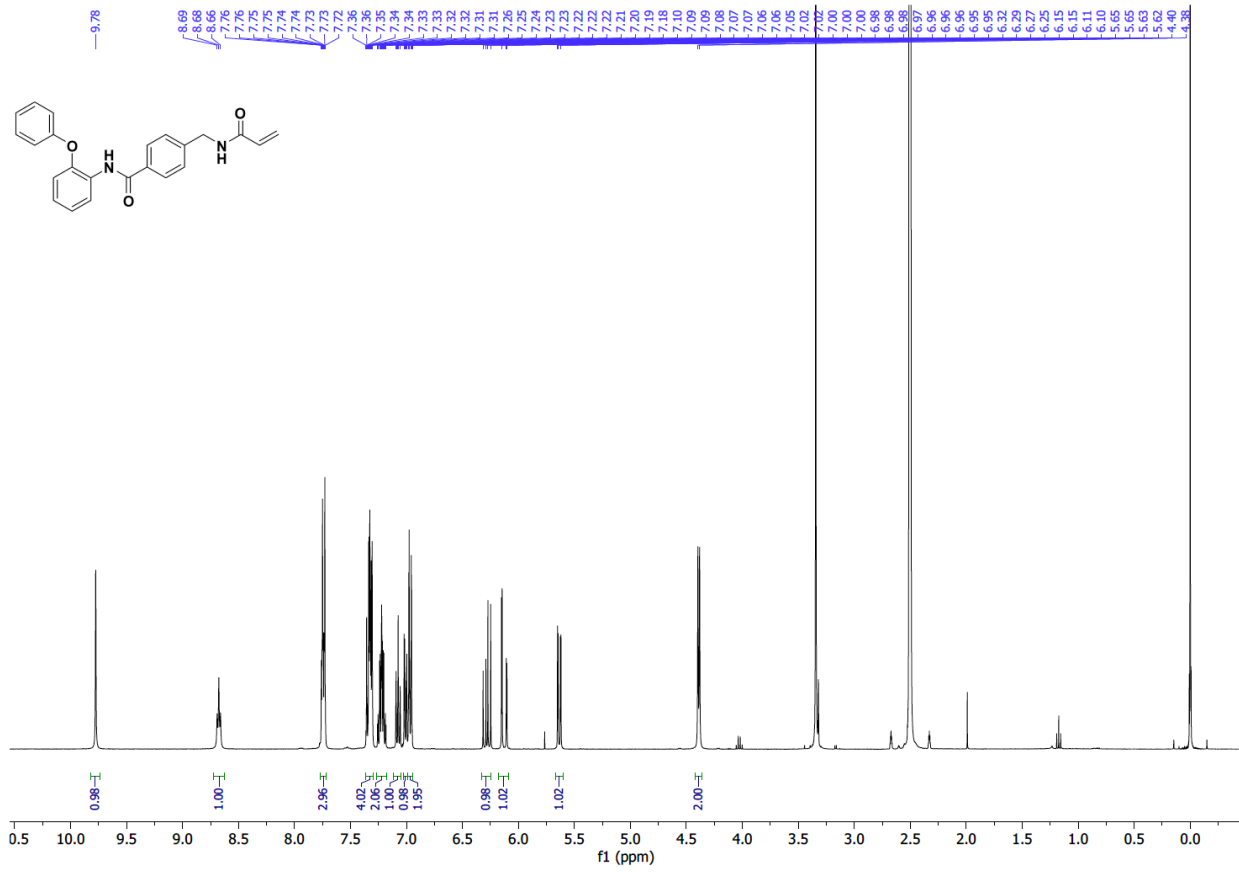

# 13C NMR

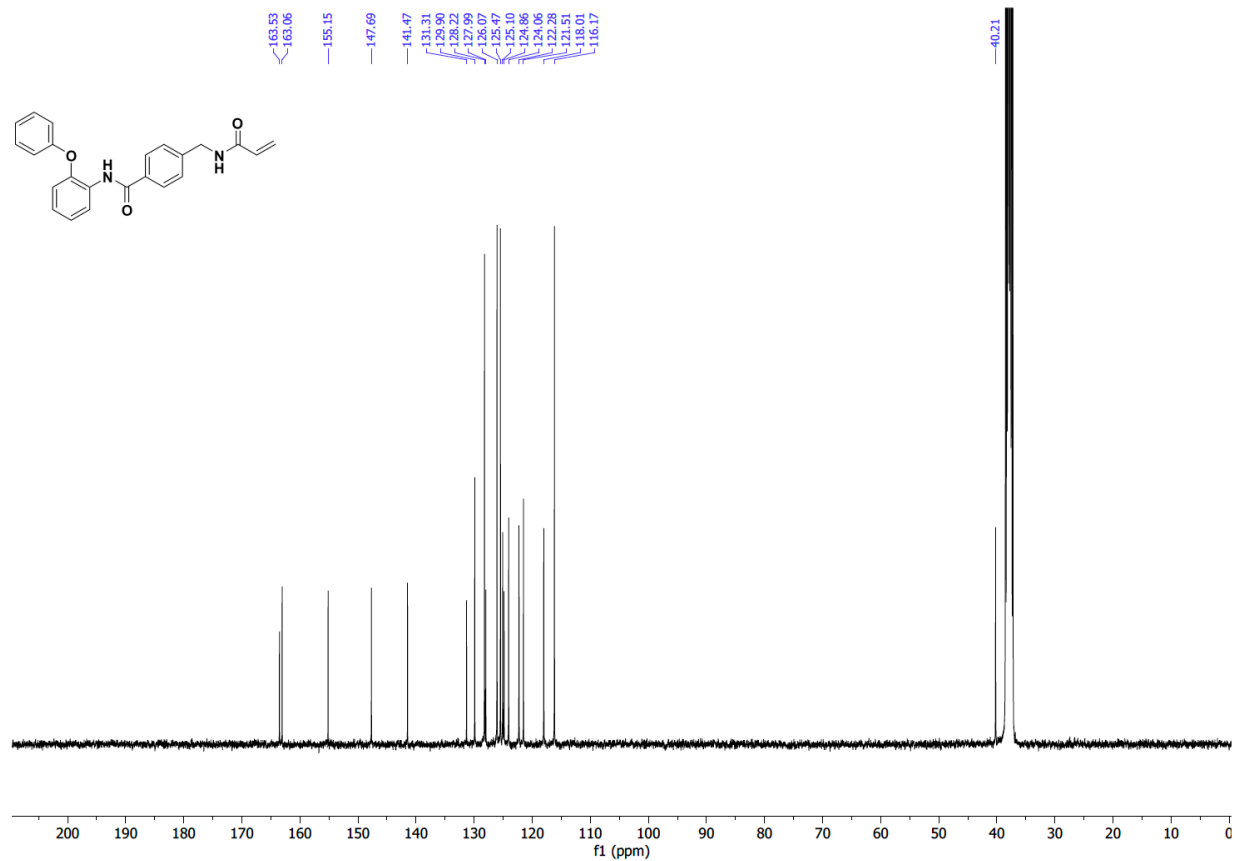

# 4-(acrylamidomethyl)-N-(2-(p-tolyloxy)phenyl)benzamide

## <sup>1</sup>H NMR

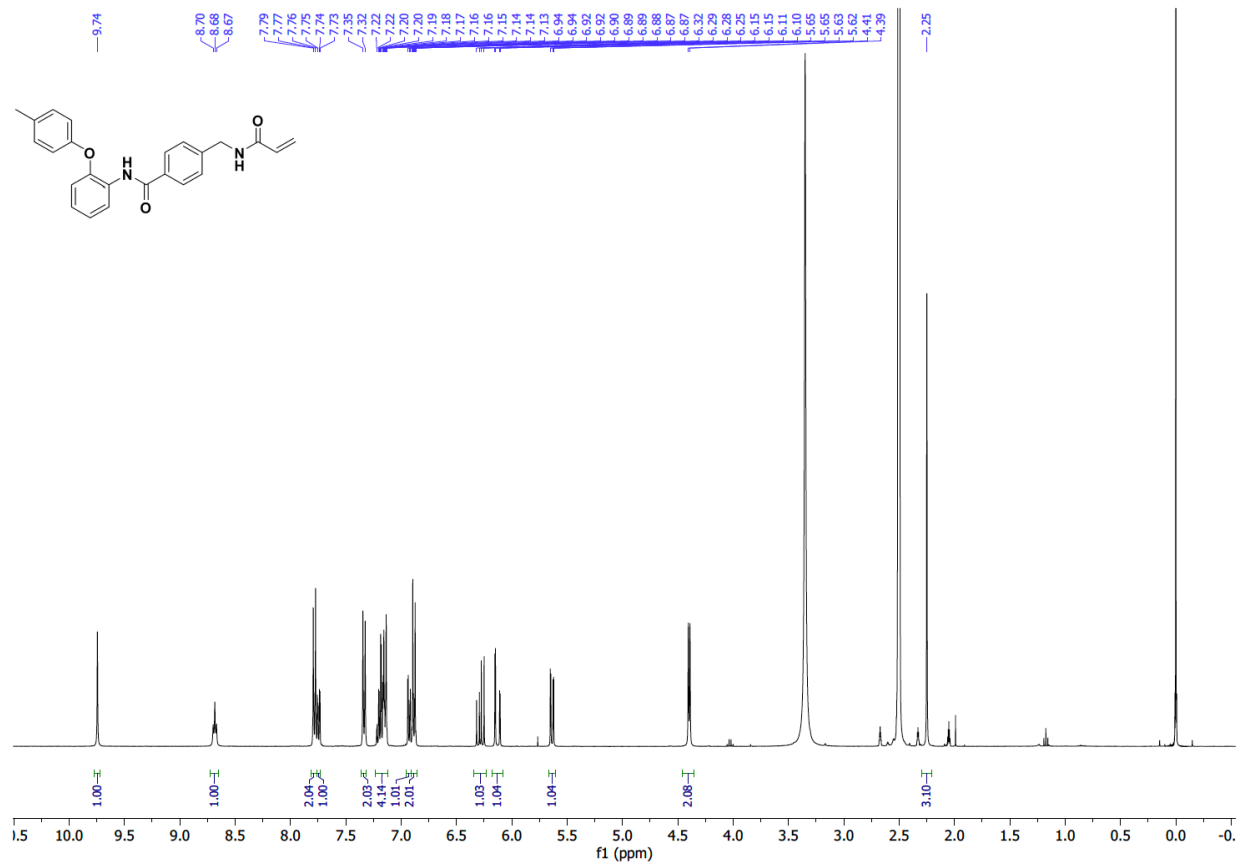

# 13C NMR

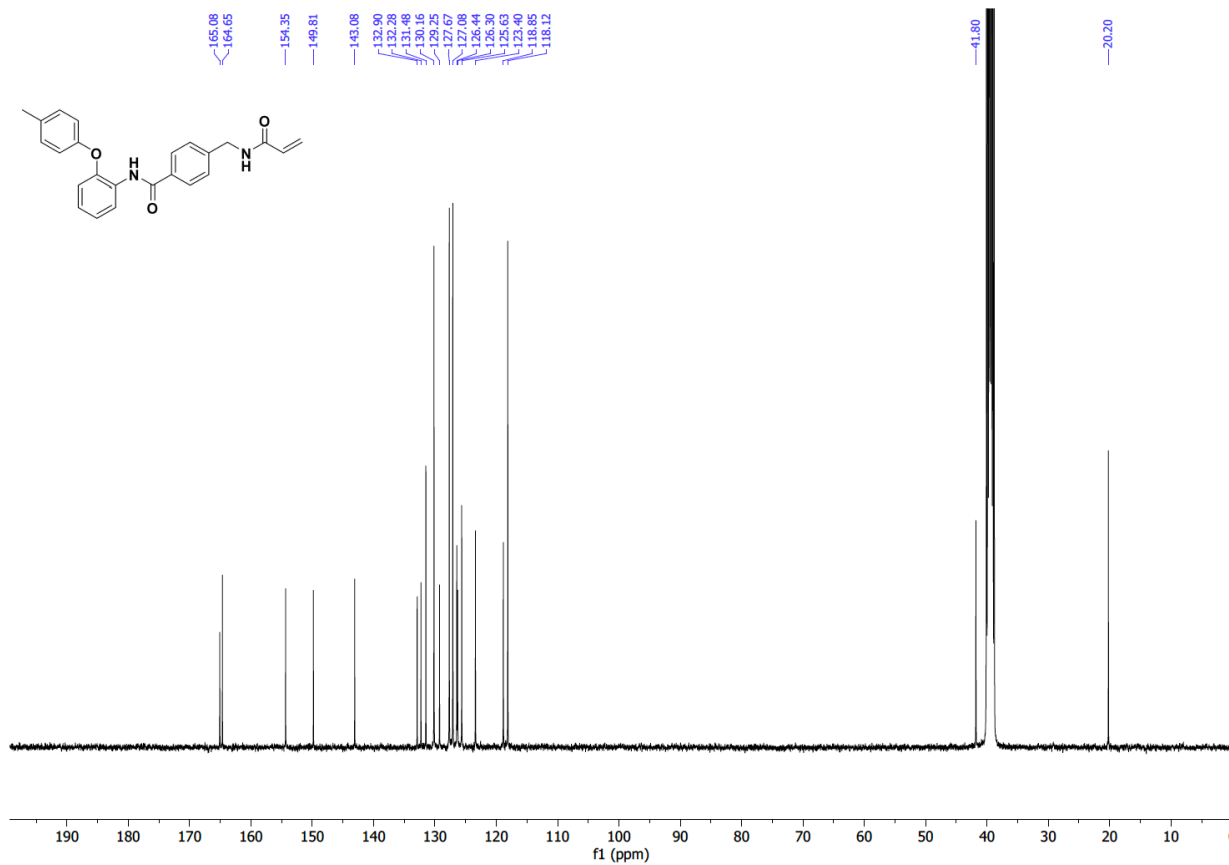

# 4-(acrylamidomethyl)-N-(2-(3-cyanophenoxy)phenyl)benzamide

## <sup>1</sup>H NMR

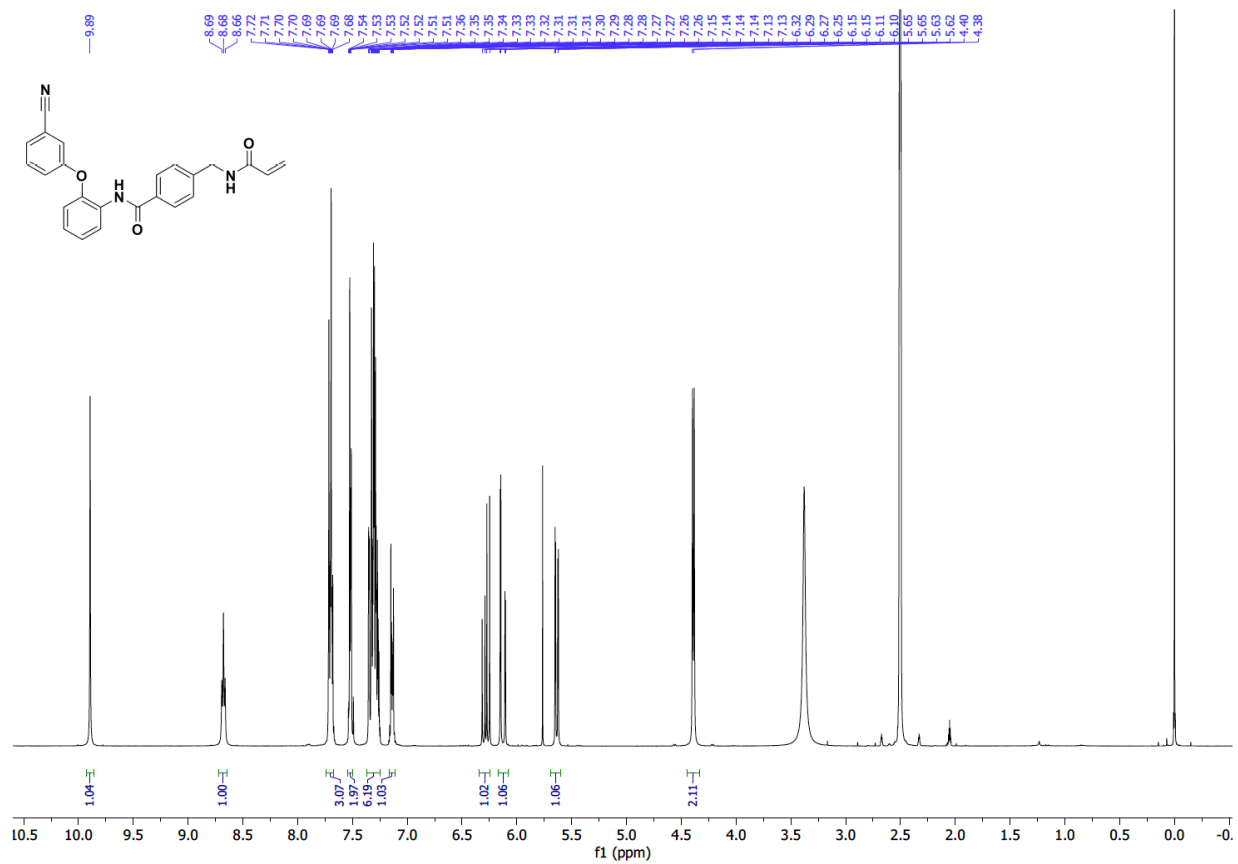



# 13C NMR

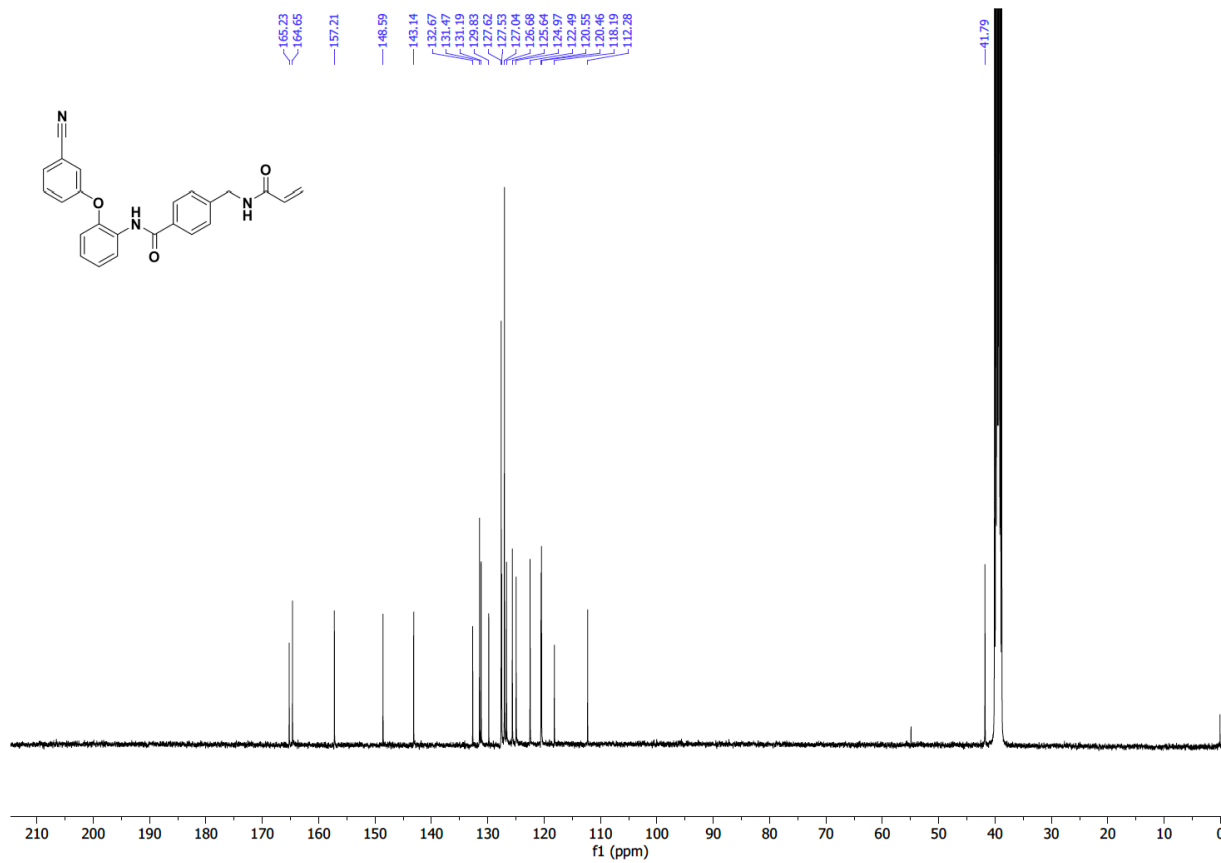

# 4-(acrylamidomethyl)-N-(2-(2-methoxyphenoxy)phenyl)benzamide

## <sup>1</sup>H NMR

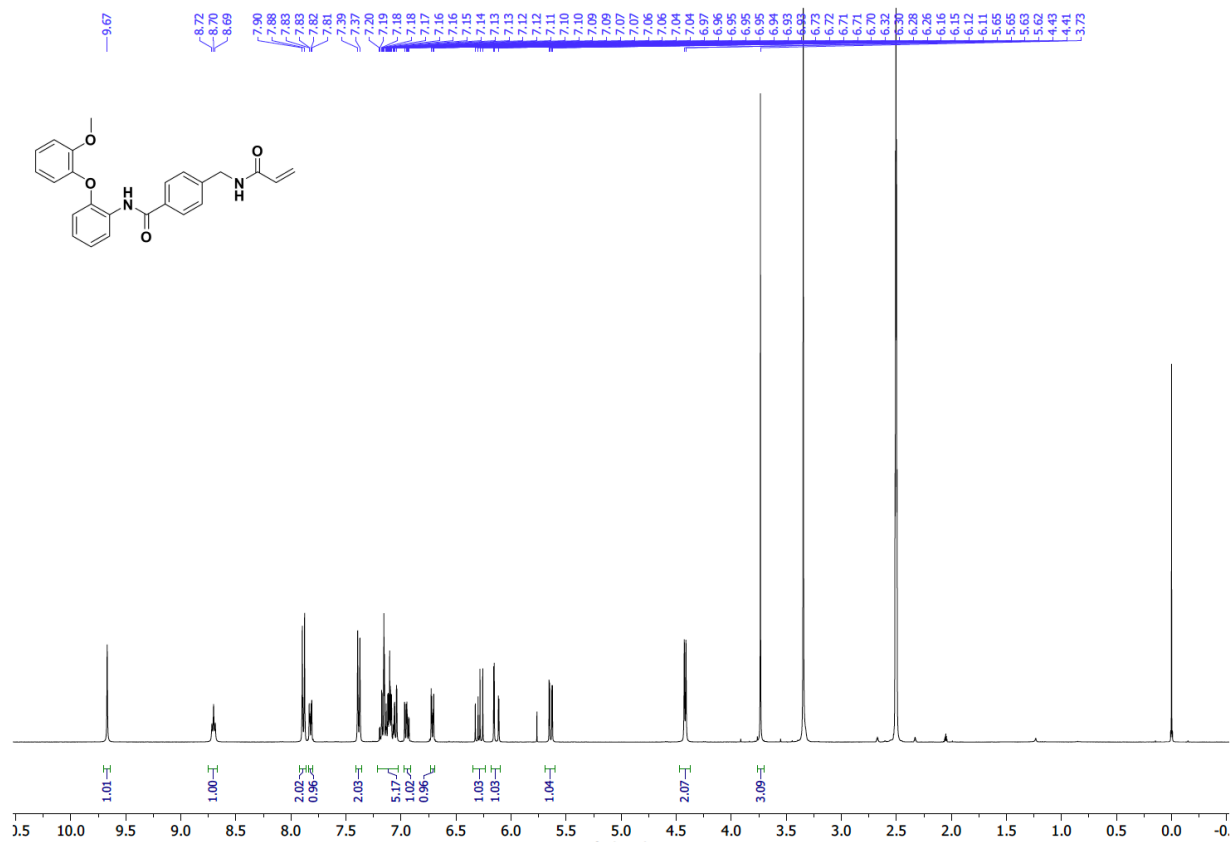

# 13C NMR

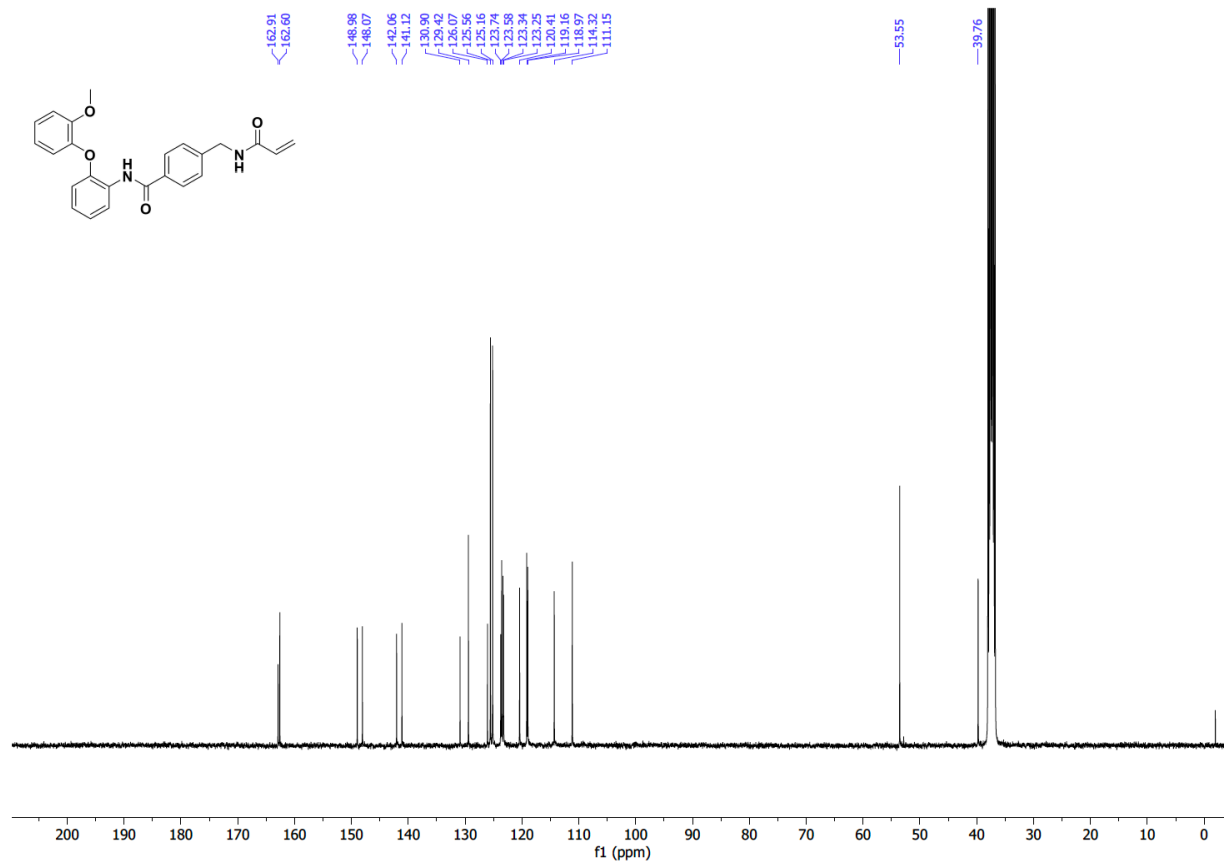

# 4-(acrylamidomethyl)-N-(2-(3-methoxyphenoxy)phenyl)benzamide

## <sup>1</sup>H NMR

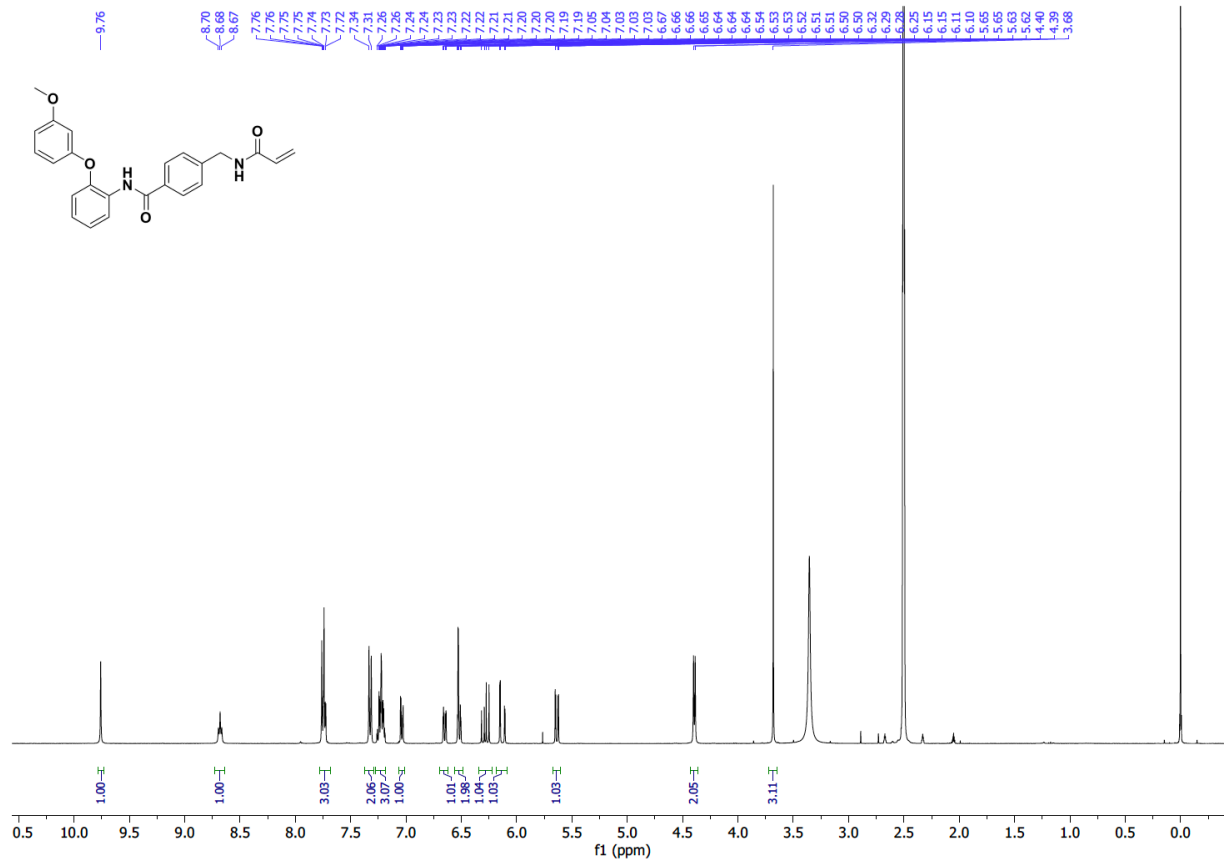

# 13C NMR

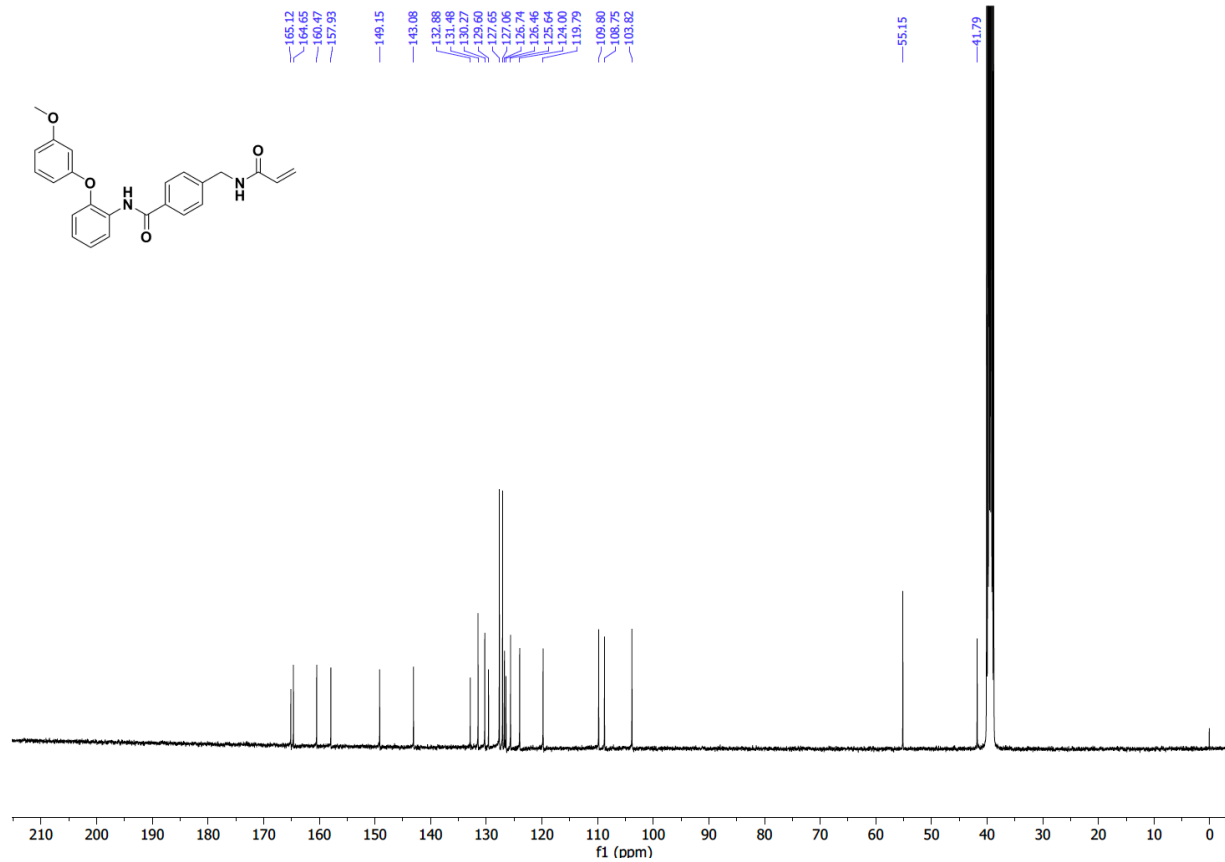

# 4-(acrylamidomethyl)-N-(3-(o-tolyloxy)phenyl)benzamide

## <sup>1</sup>H NMR

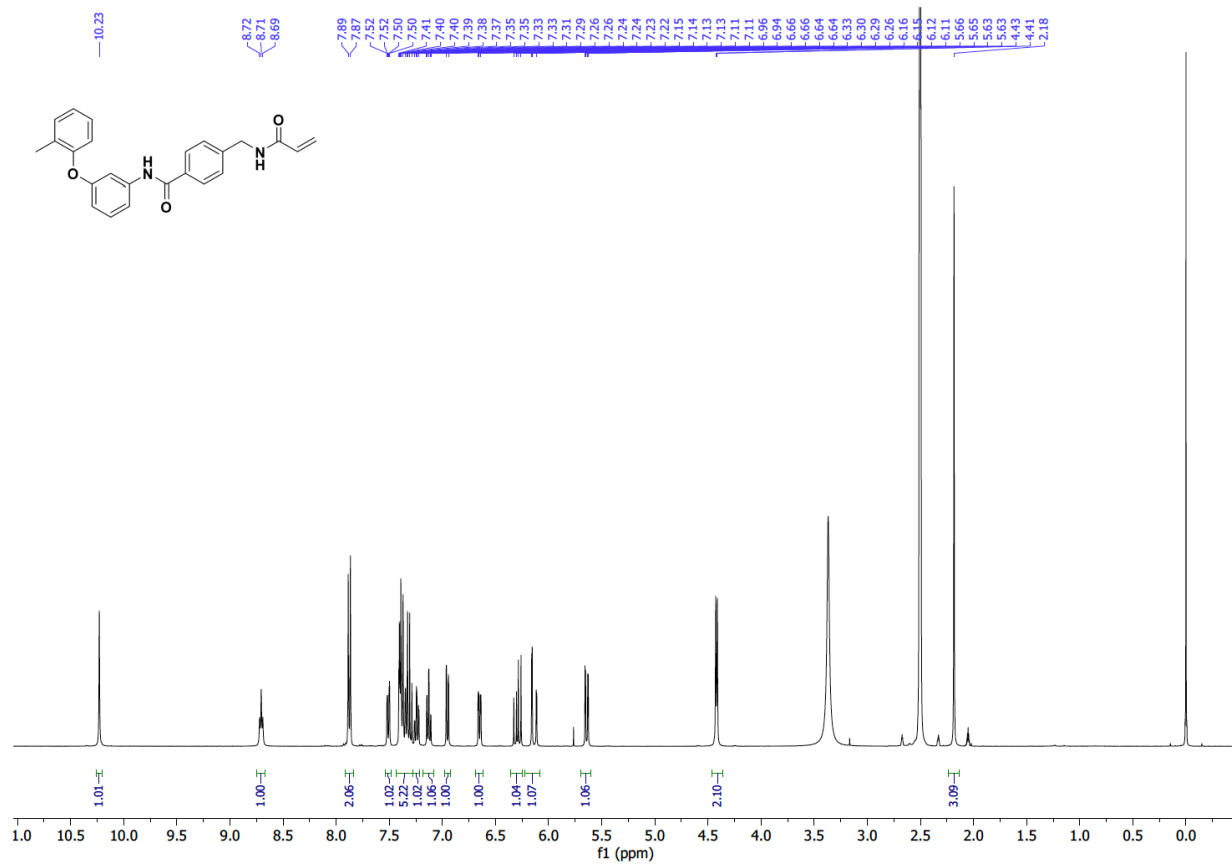

# 13C NMR

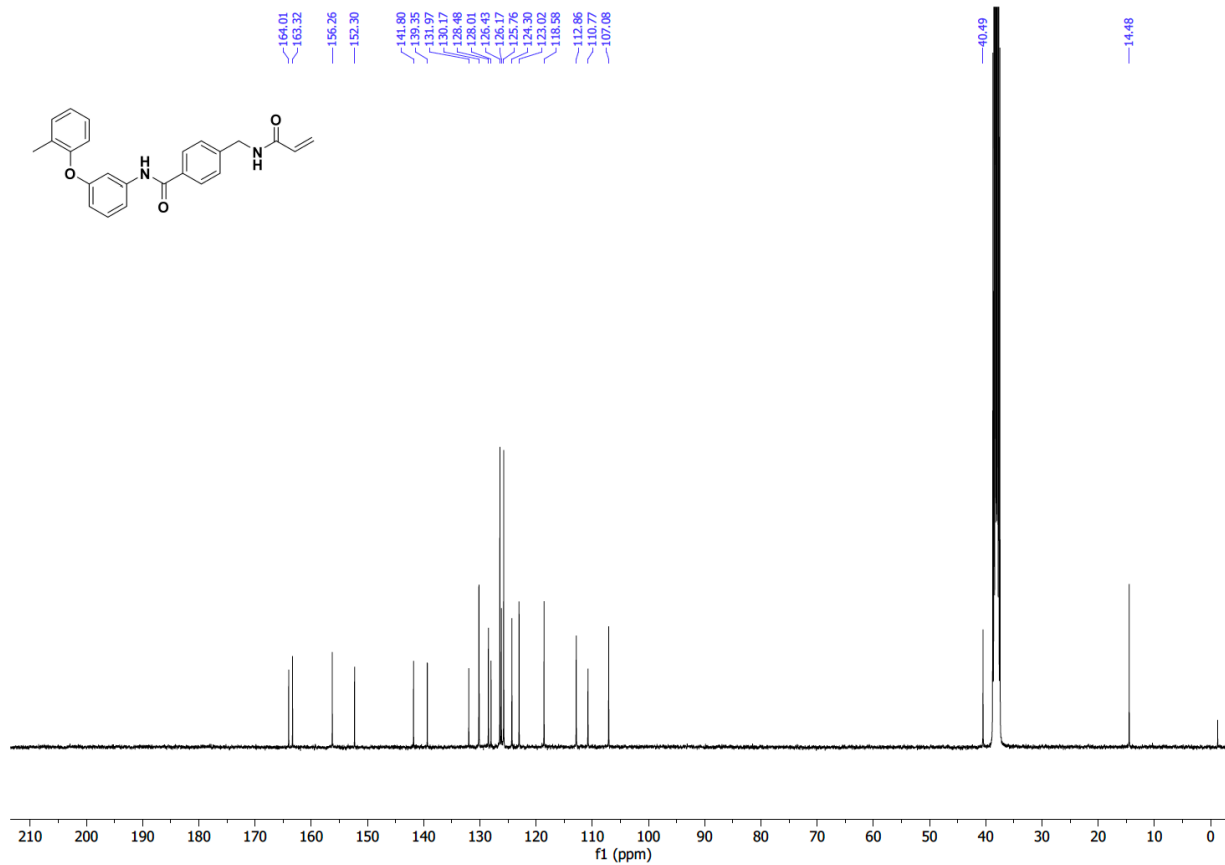

# 4-(acrylamidomethyl)-N-(4-(p-tolyloxy)phenyl)benzamide

## <sup>1</sup>H NMR

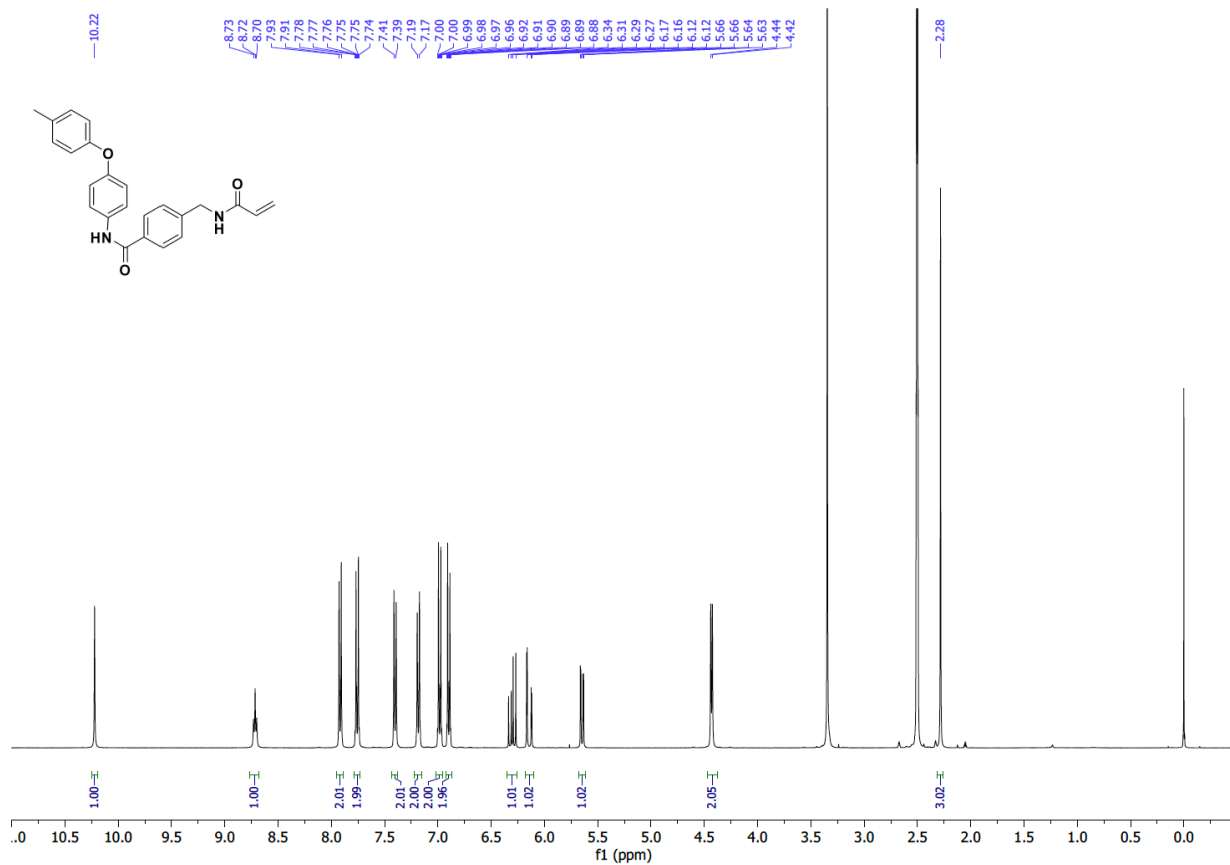



# 13C NMR

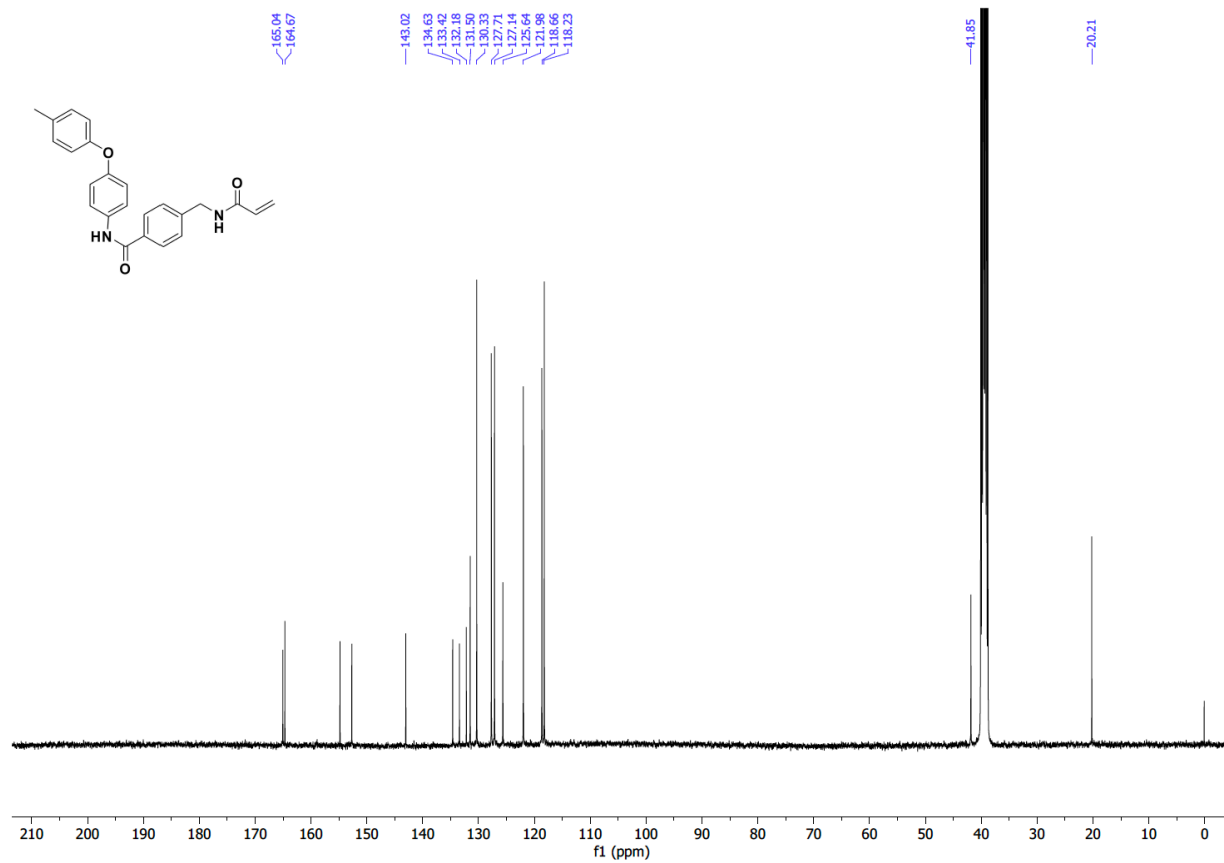

# 4-(acrylamidomethyl)-N-(4-(2-methoxyphenoxy)phenyl)benzamide 1H NMR

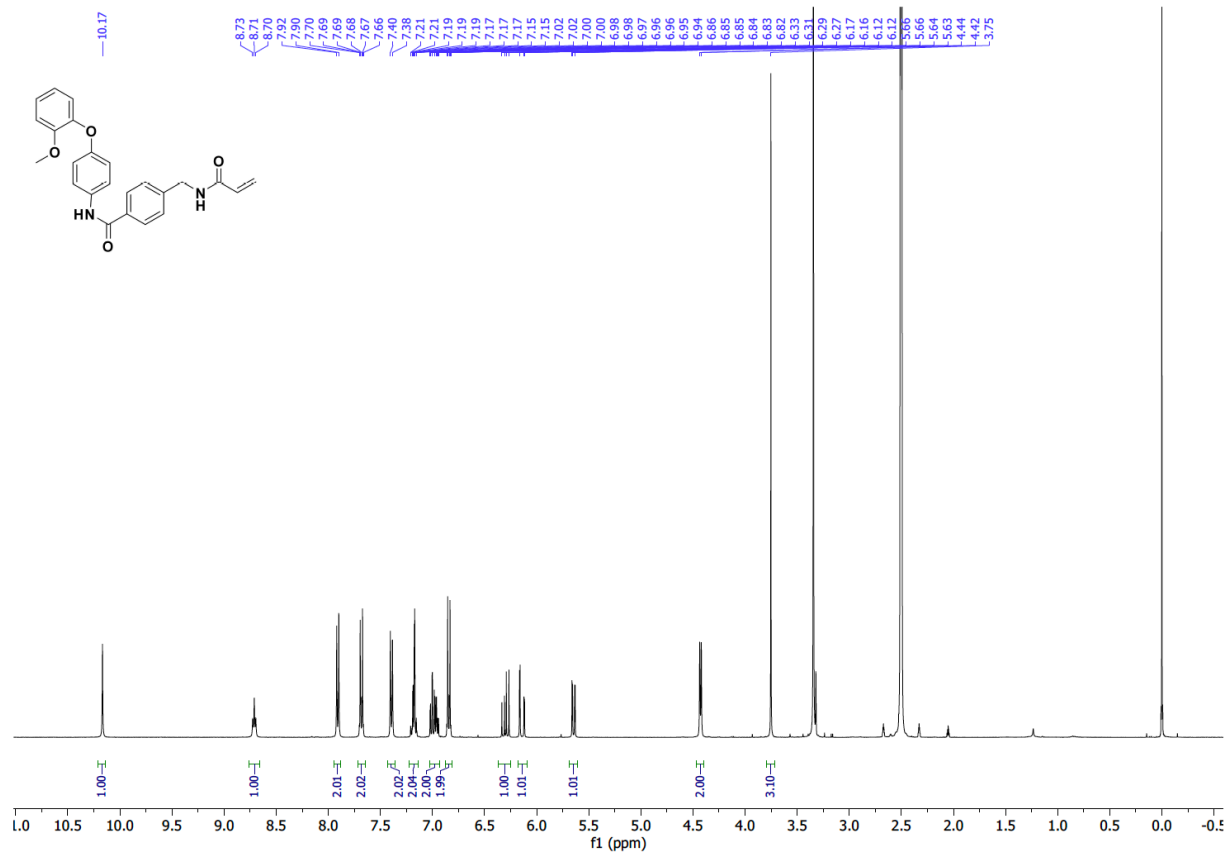

# 13C NMR

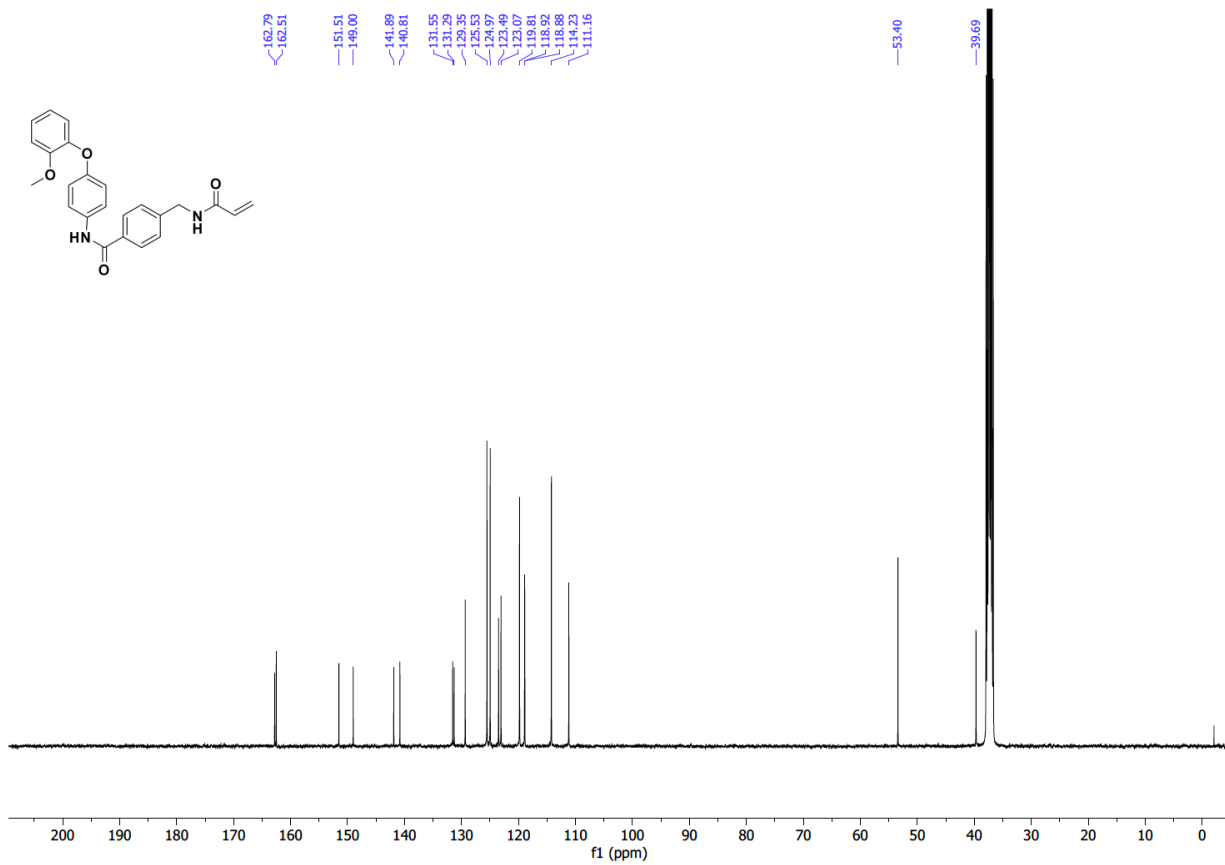

# 4-(acrylamidomethyl)-N-(4-(3-methoxyphenoxy)phenyl)benzamide 1H NMR

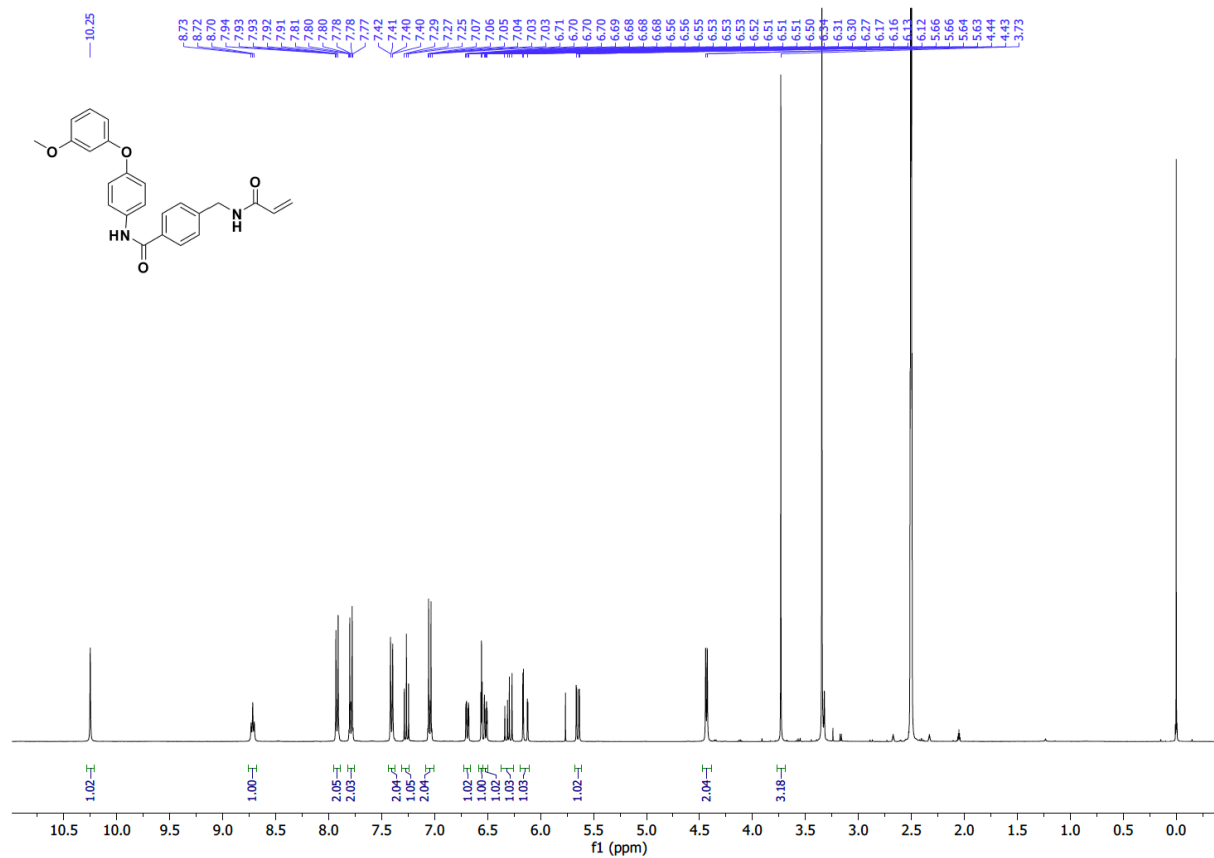

# 13C NMR

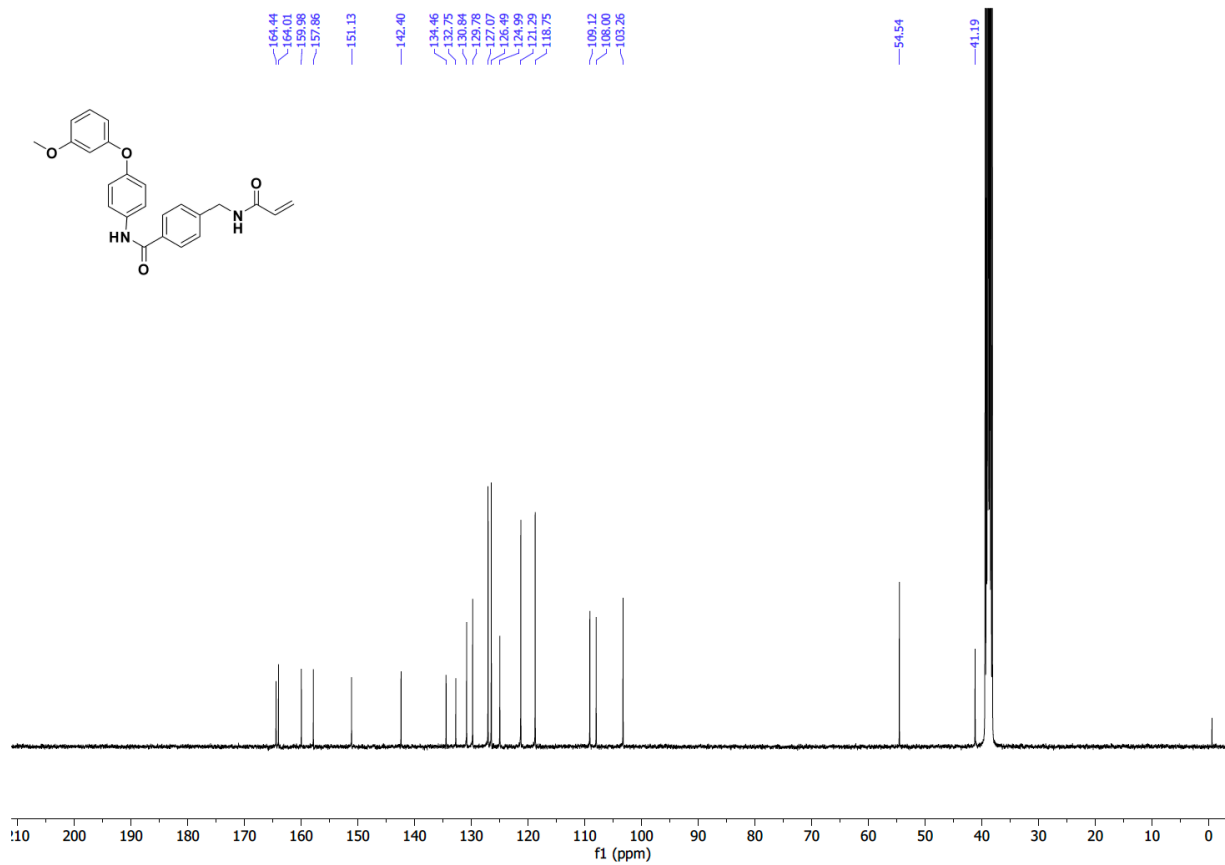

# 4-(prop-2-yn-1-yloxy)phenol 1H NMR

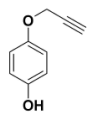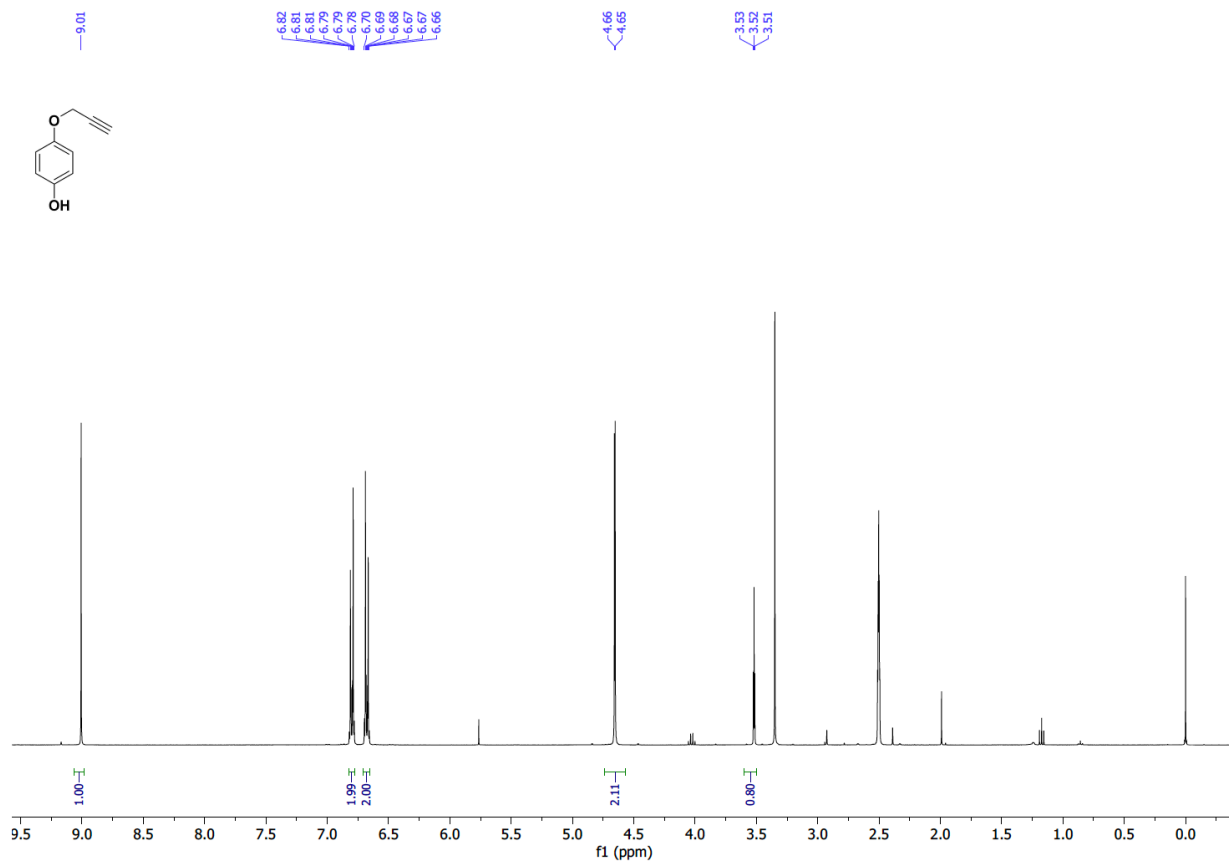

# 1-nitro-2-(4-(prop-2-yn-1-yloxy)phenoxy)benzene

## <sup>1</sup>H NMR

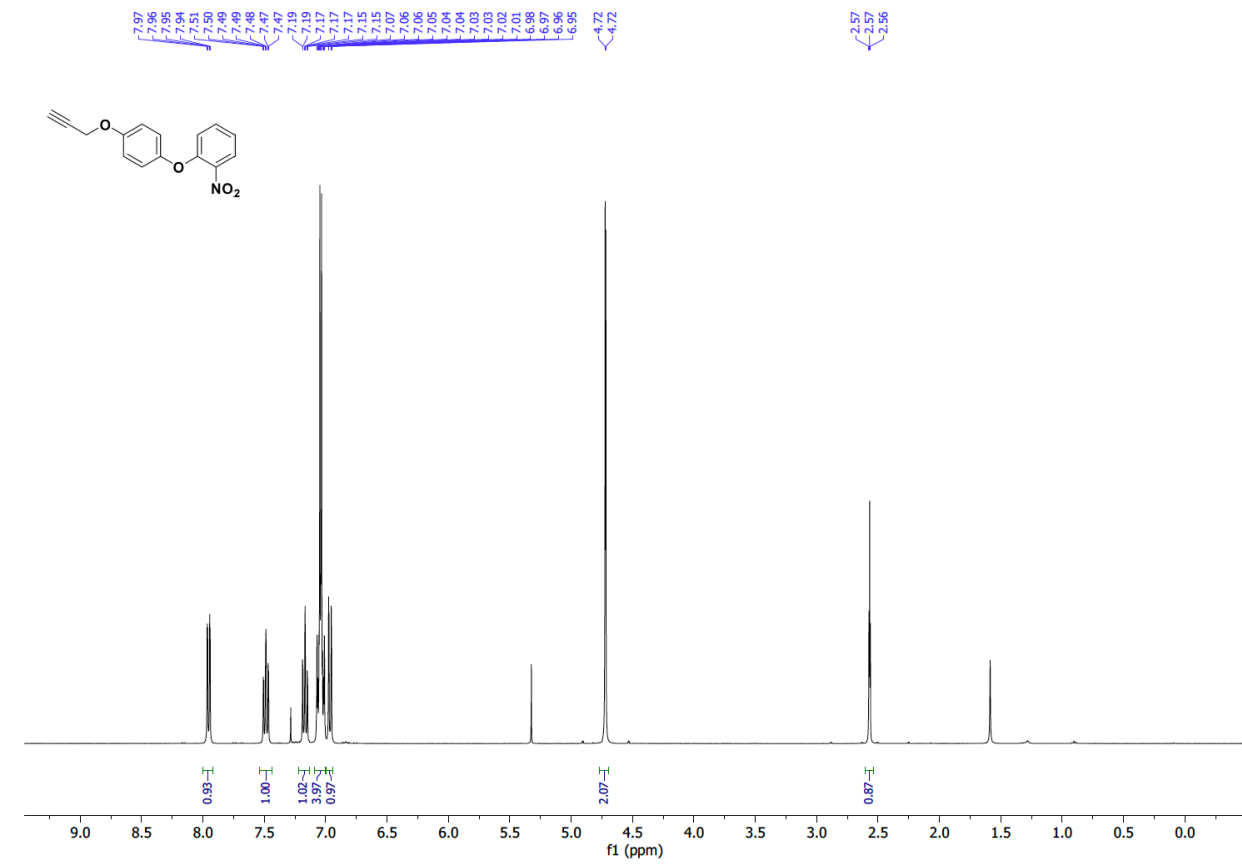

# 4-(acrylamidomethyl)-N-(2-(4-(prop-2-yn-1-yloxy)phenoxy)phenyl)benzamide

## <sup>1</sup>H NMR

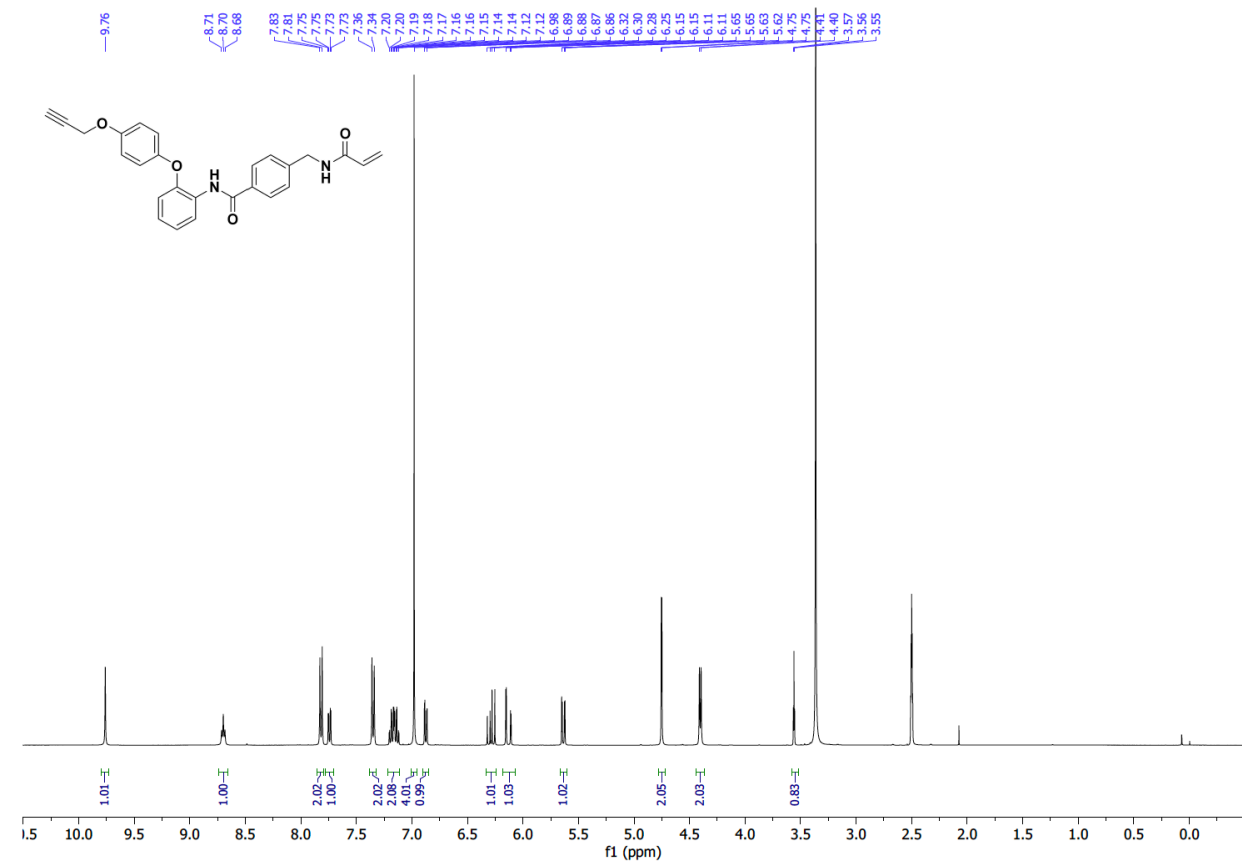



# 13C NMR

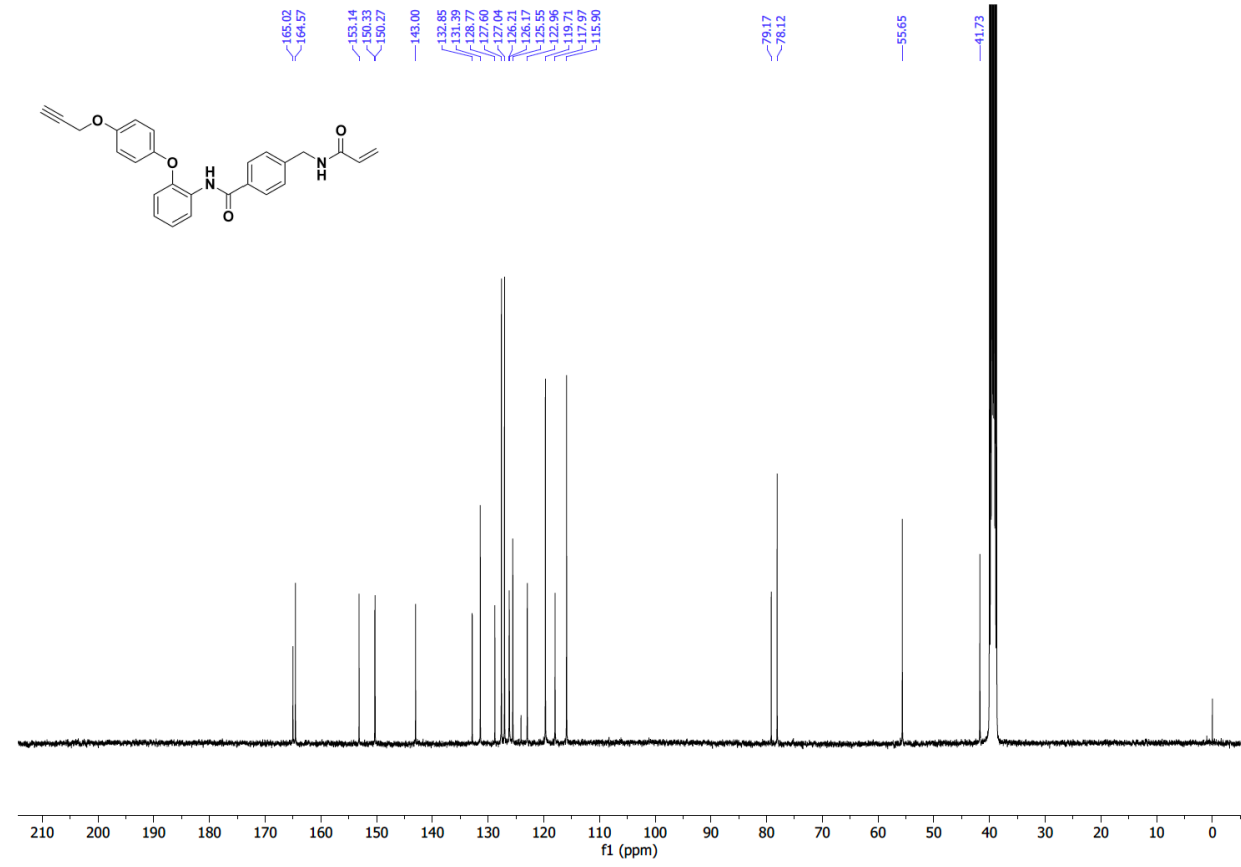

# 2-fluoro-1-nitro-4-(prop-2-yn-1-yloxy)benzene

## <sup>1</sup>H NMR

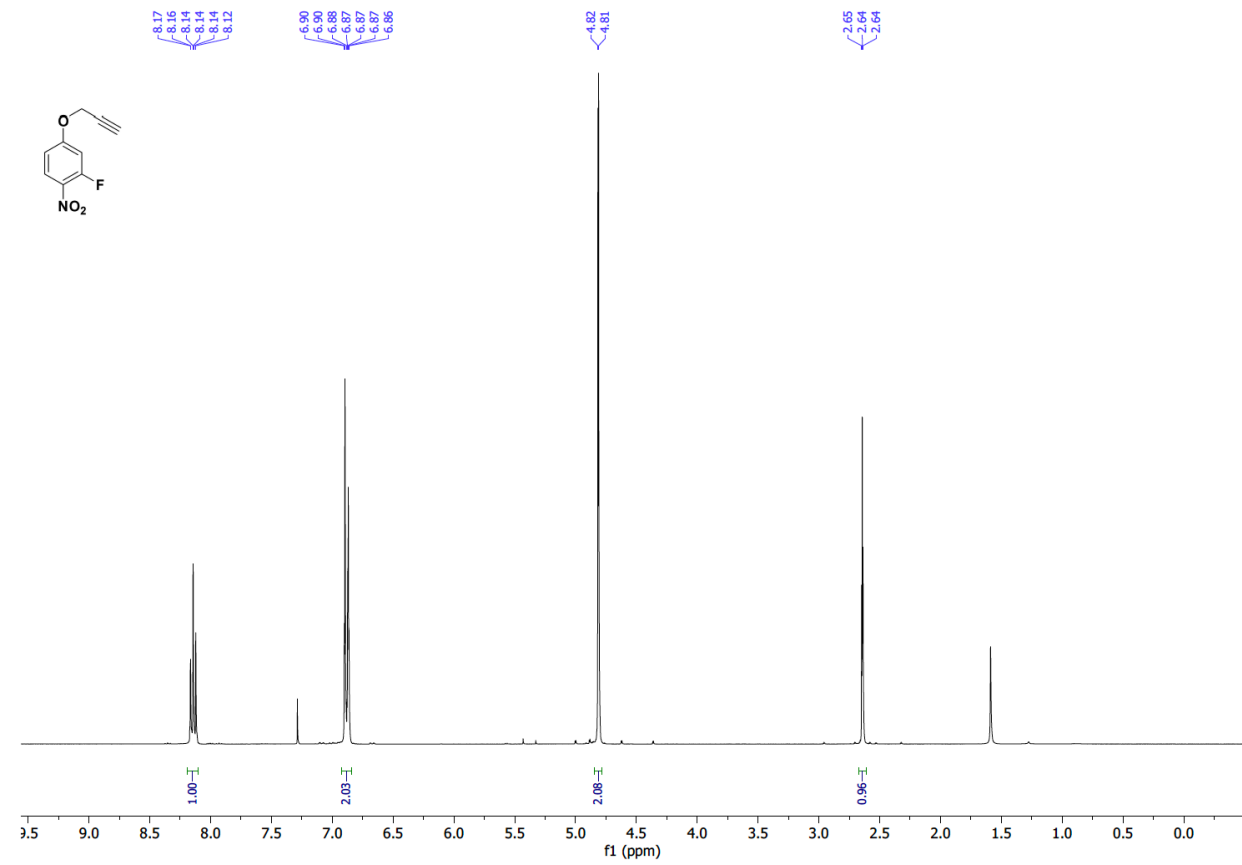

# 2-(4-ethoxyphenoxy)-1-nitro-4-(prop-2-yn-1-yloxy)benzene

## <sup>1</sup>H NMR

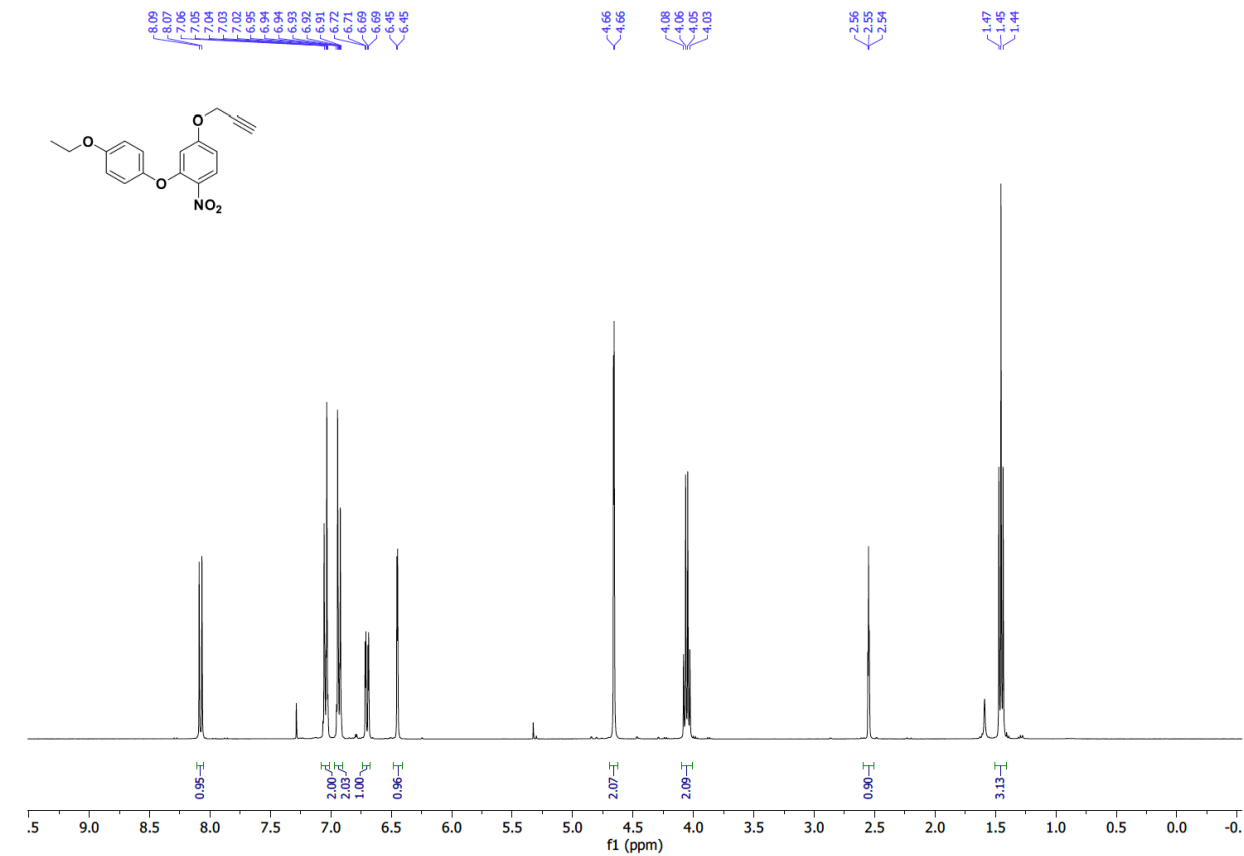

# 2-(4-ethoxyphenoxy)-4-(prop-2-yn-1-yloxy)aniline 1H NMR

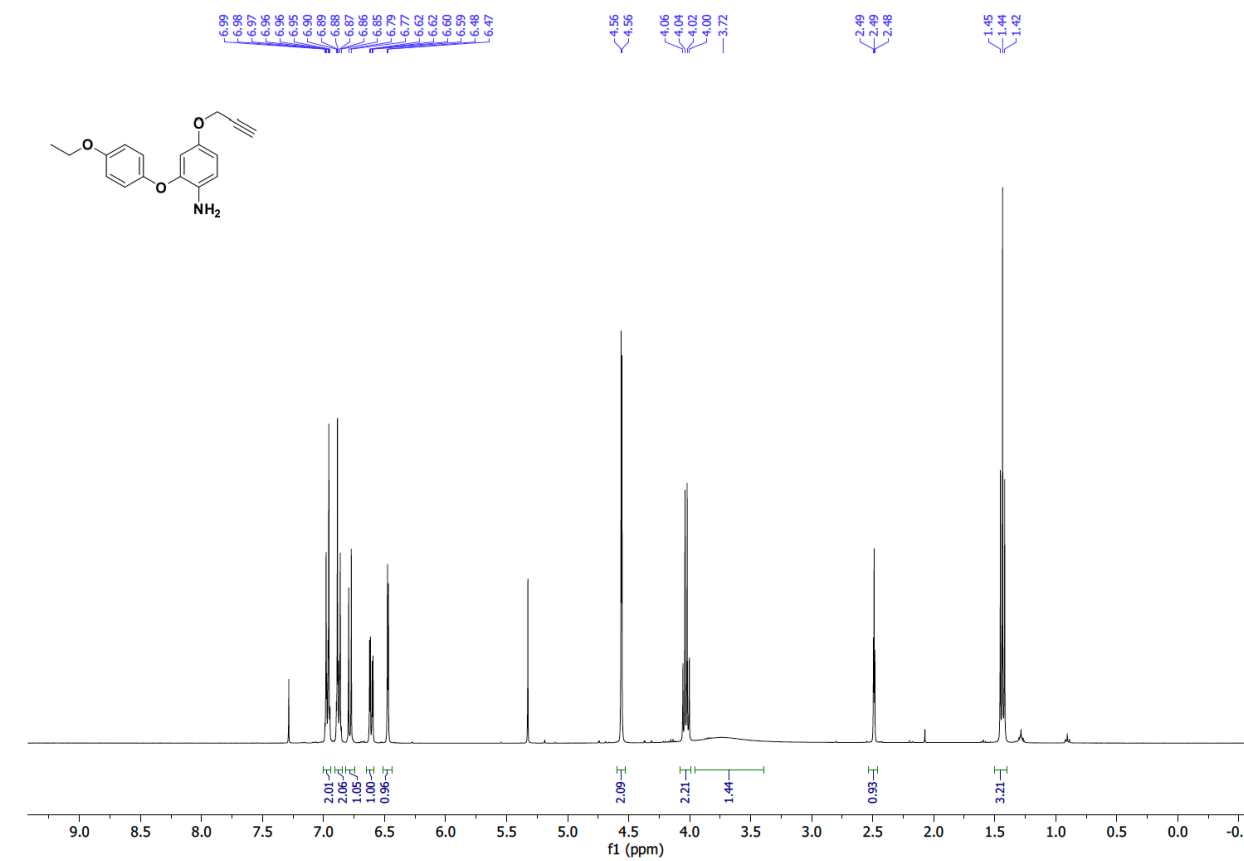

# 4-(acrylamidomethyl)-N-(2-(4-ethoxyphenoxy)-4-(prop-2-yn-1-yloxy)phenyl) benzamide 1H NMR

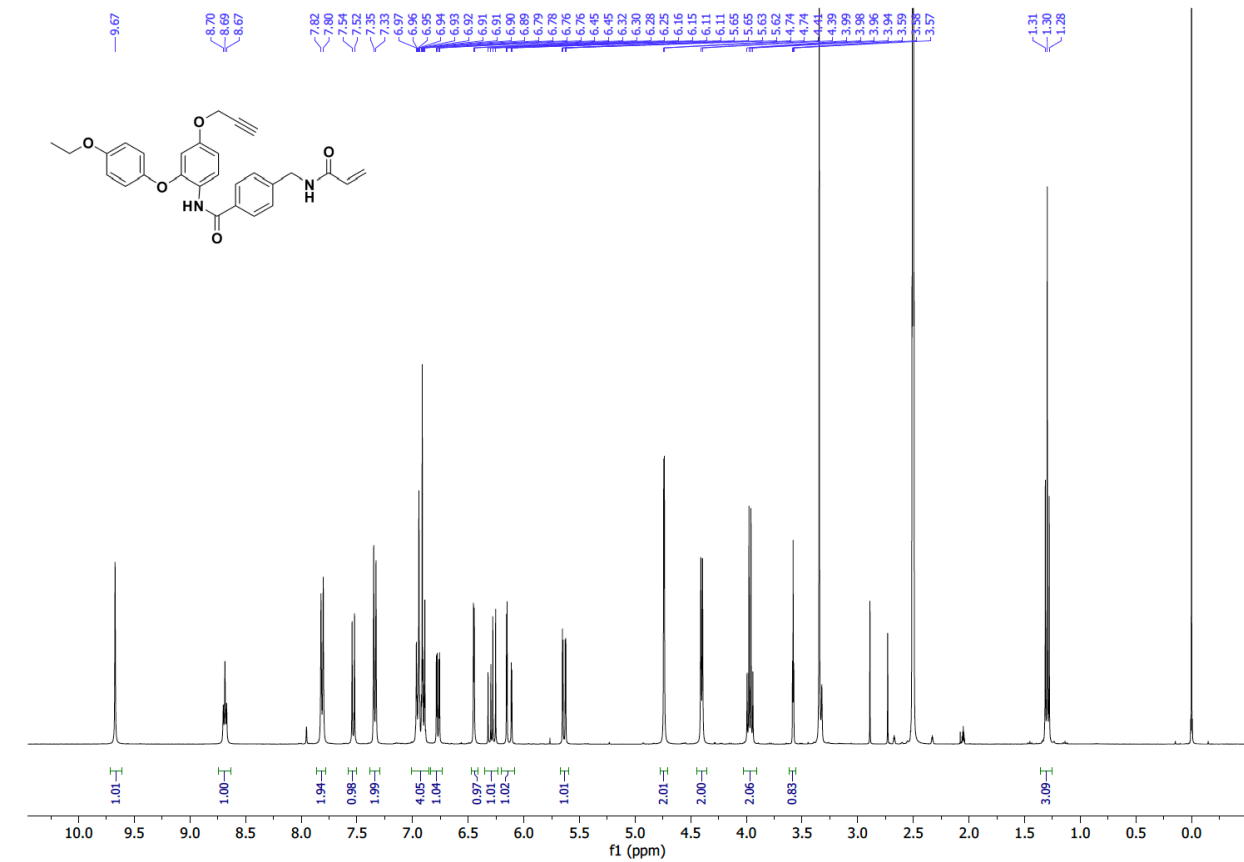

# 13C NMR

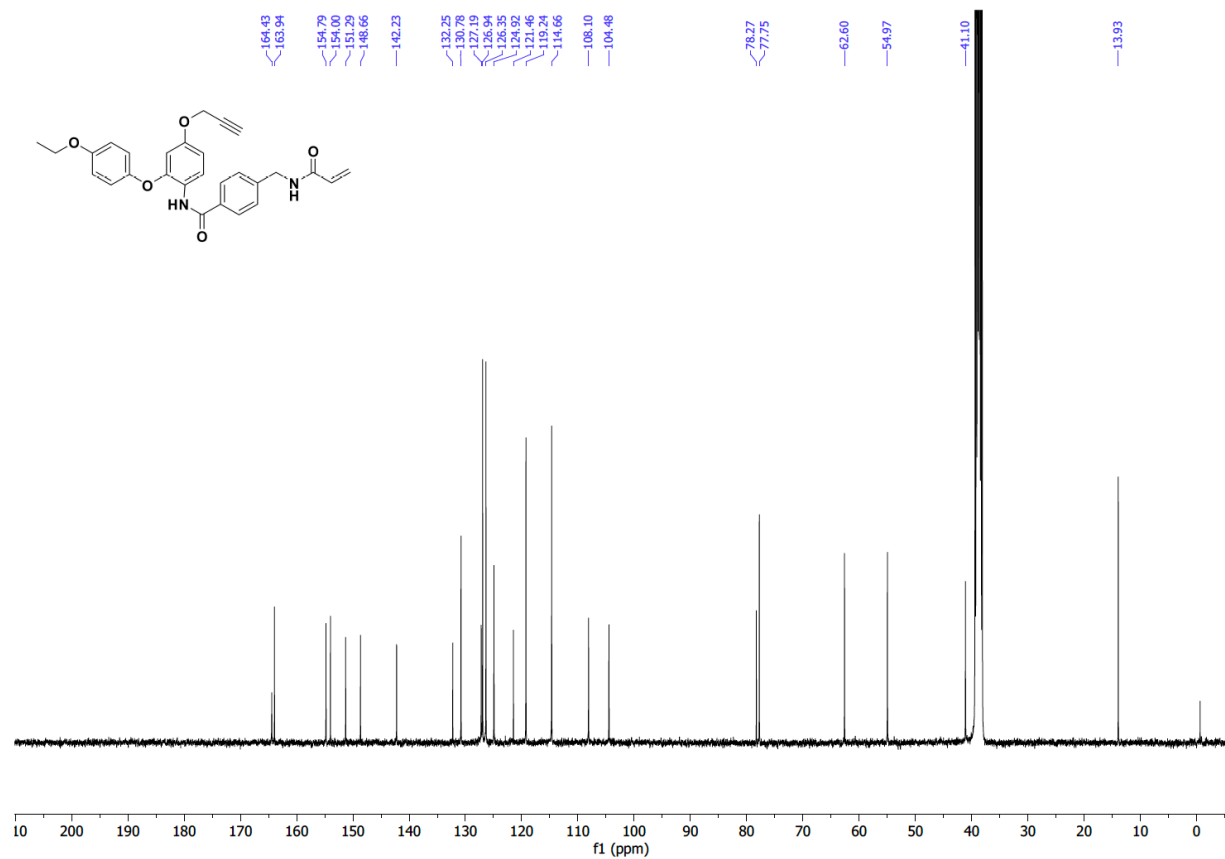

# 5-ethoxy-2-(2-nitrophenoxy)benzaldehyde

## <sup>1</sup>H NMR

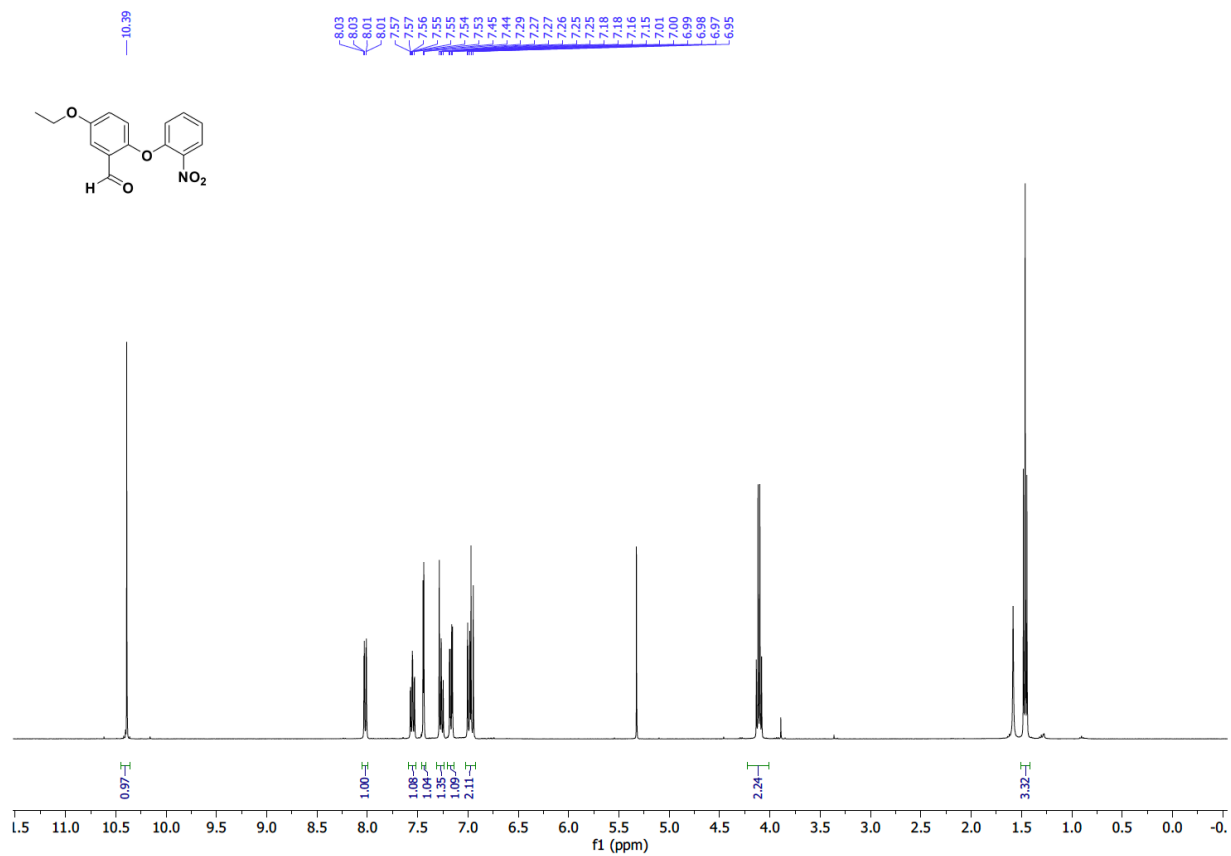

# 4-ethoxy-2-ethynyl-1-(2-nitrophenoxy)benzene 1H NMR

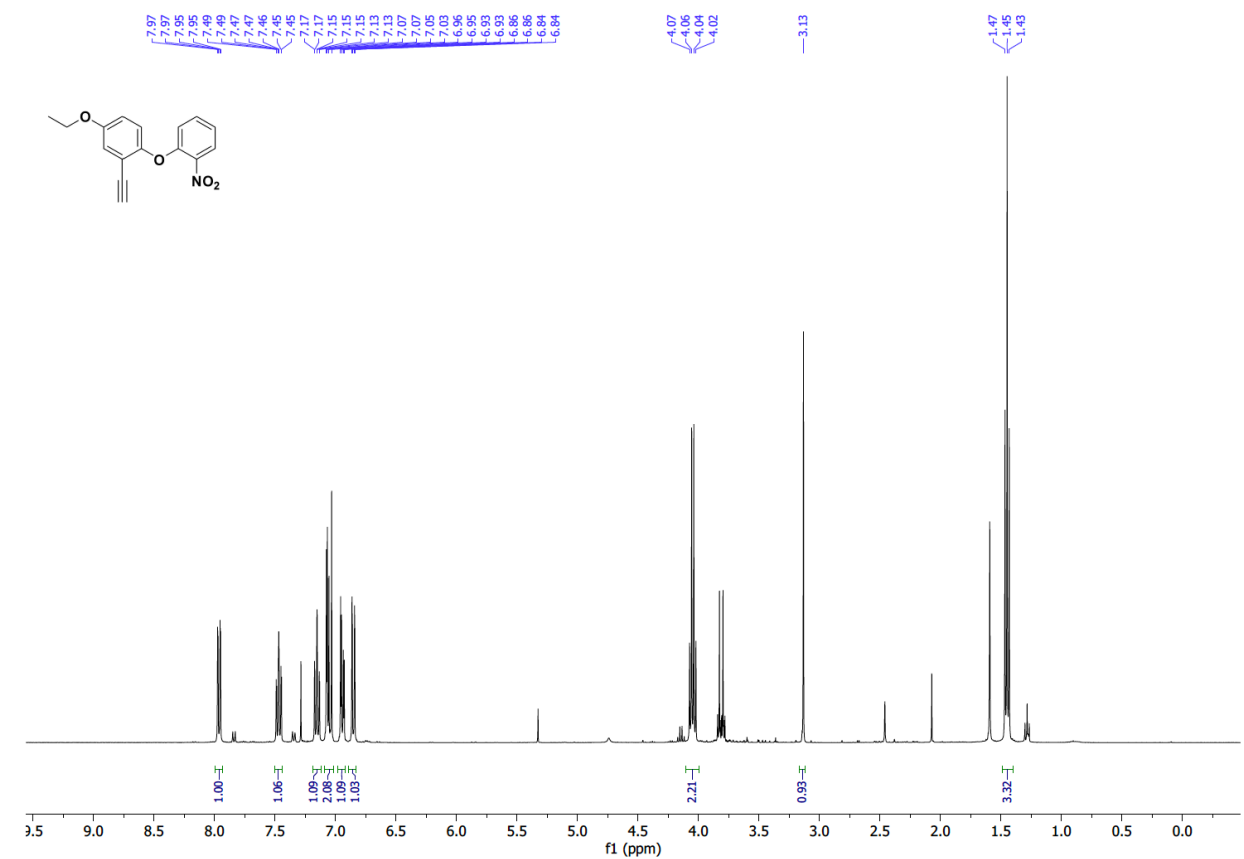





# 13C NMR

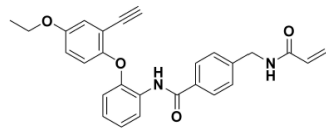

160.24  
159.65  
150.16  
145.17  
141.45  
136.95  
128.93  
125.12  
123.83  
122.87  
122.37  
118.76  
118.39  
115.80  
115.34  
115.70  
115.70  
110.82  
110.33

77.10  
73.42

58.87

37.98

9.54

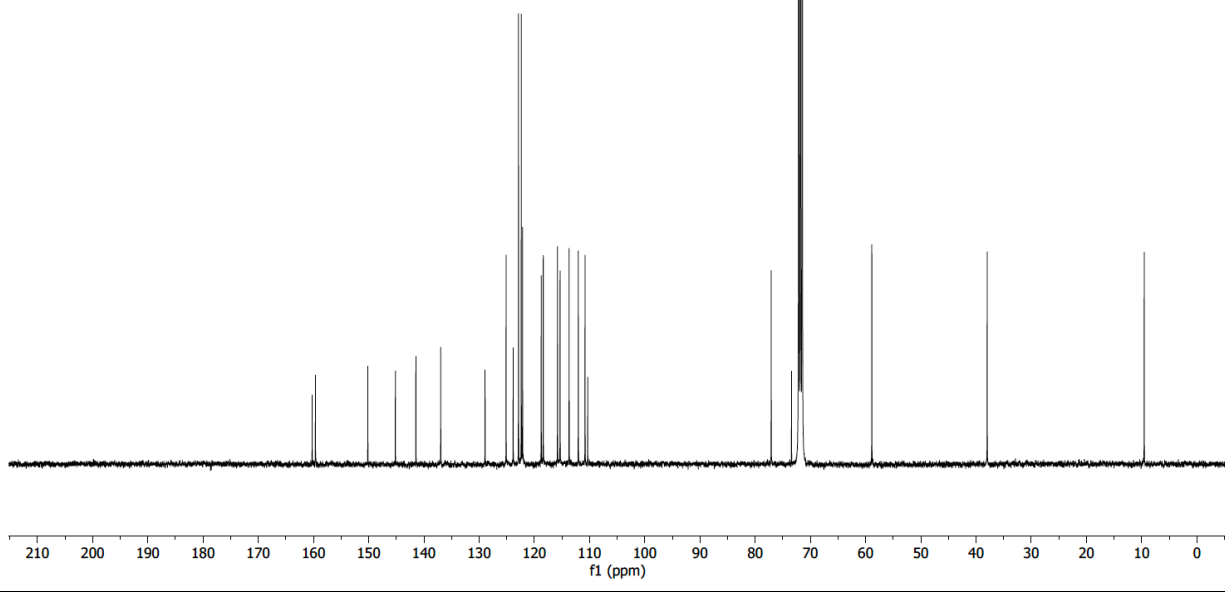

# 1-(4-ethoxyphenoxy)-4-ethynyl-2-nitrobenzene

## <sup>1</sup>H NMR

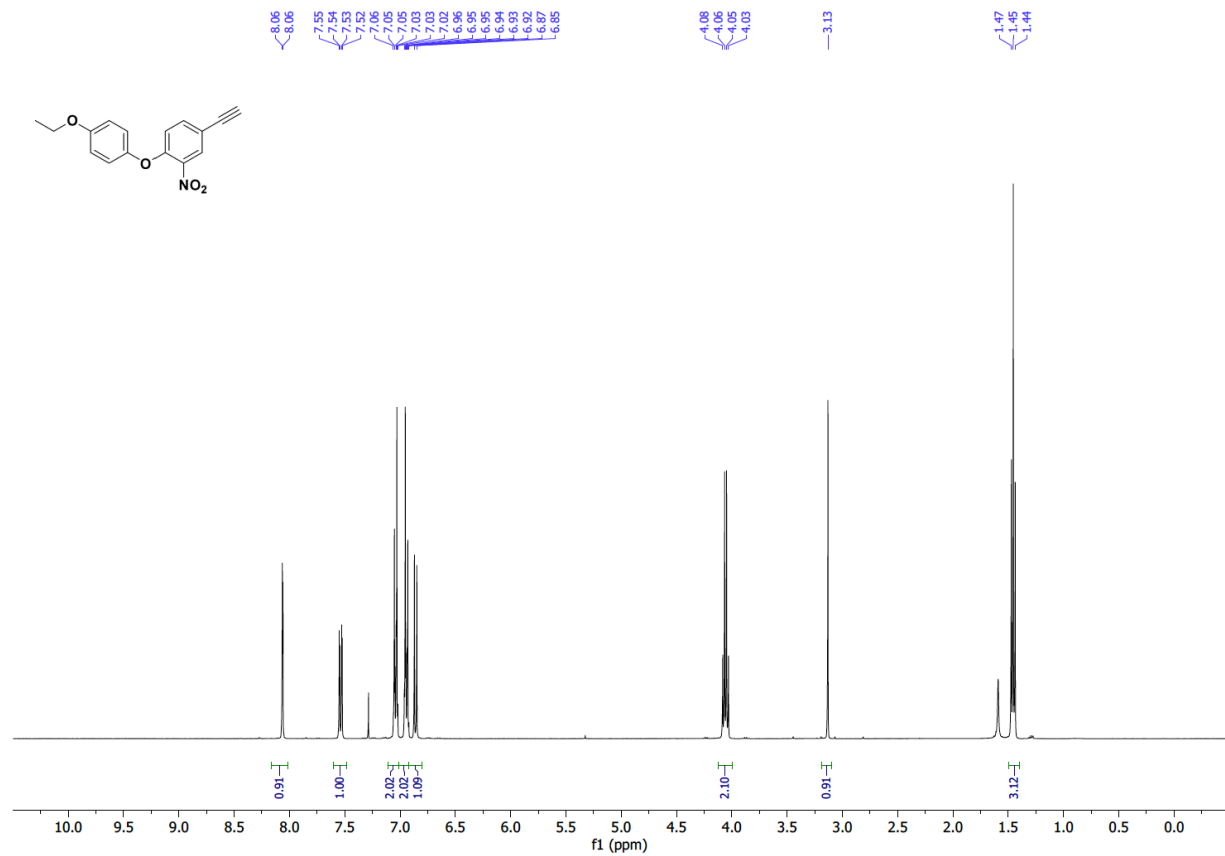

# 4-(acrylamidomethyl)-N-(2-(4-ethoxyphenoxy)-5-ethynylphenyl)benzamide 1H NMR

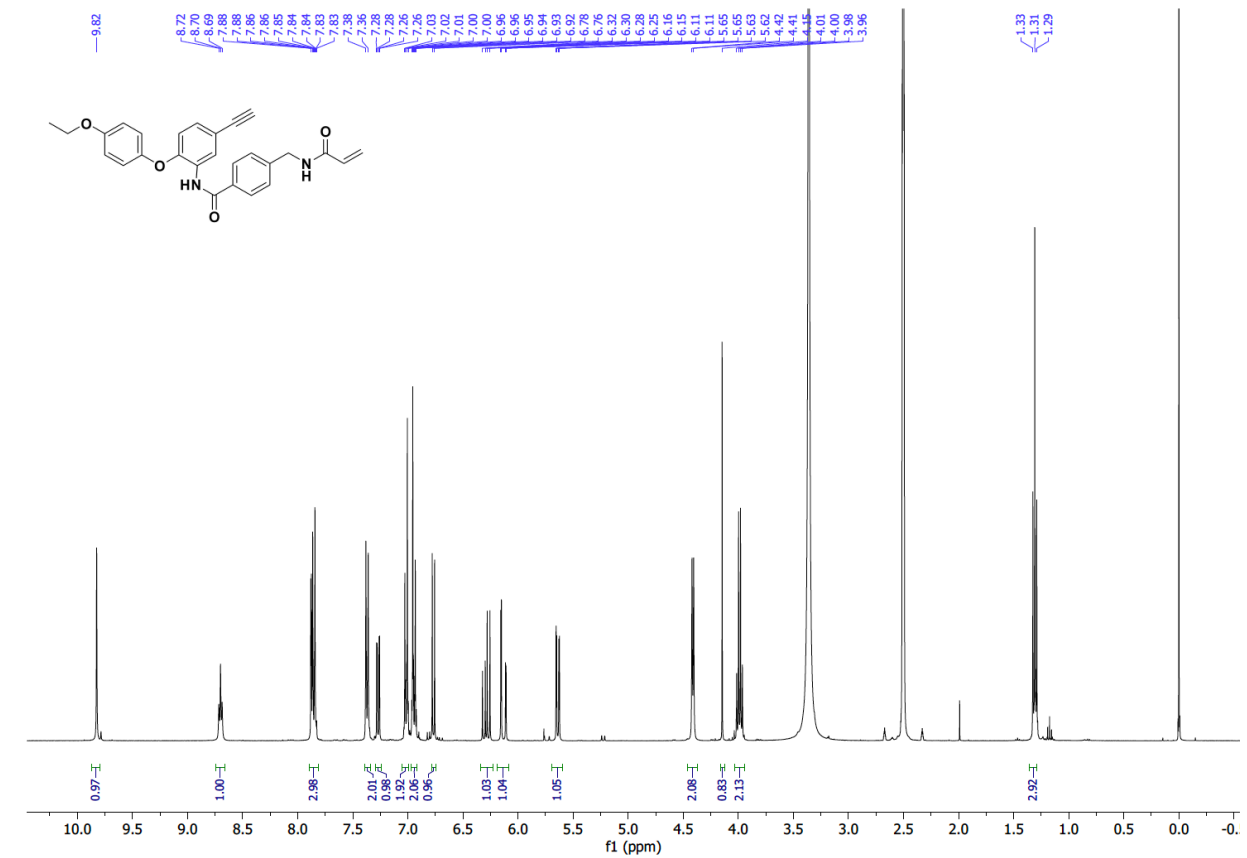

# 13C NMR

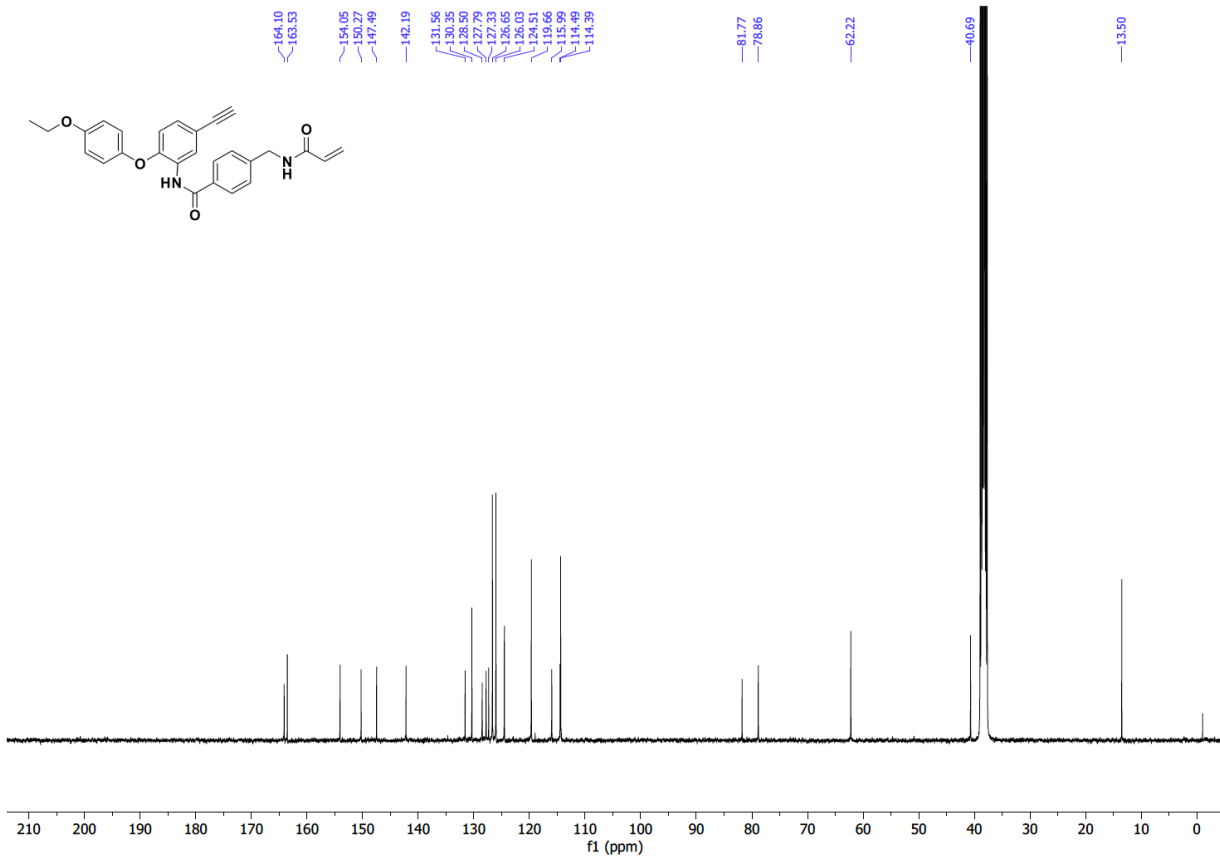

**tert-butyl (4-((2-(4-ethoxyphenoxy)phenyl)carbamoyl)benzyl) carbamate**  
**1H NMR**

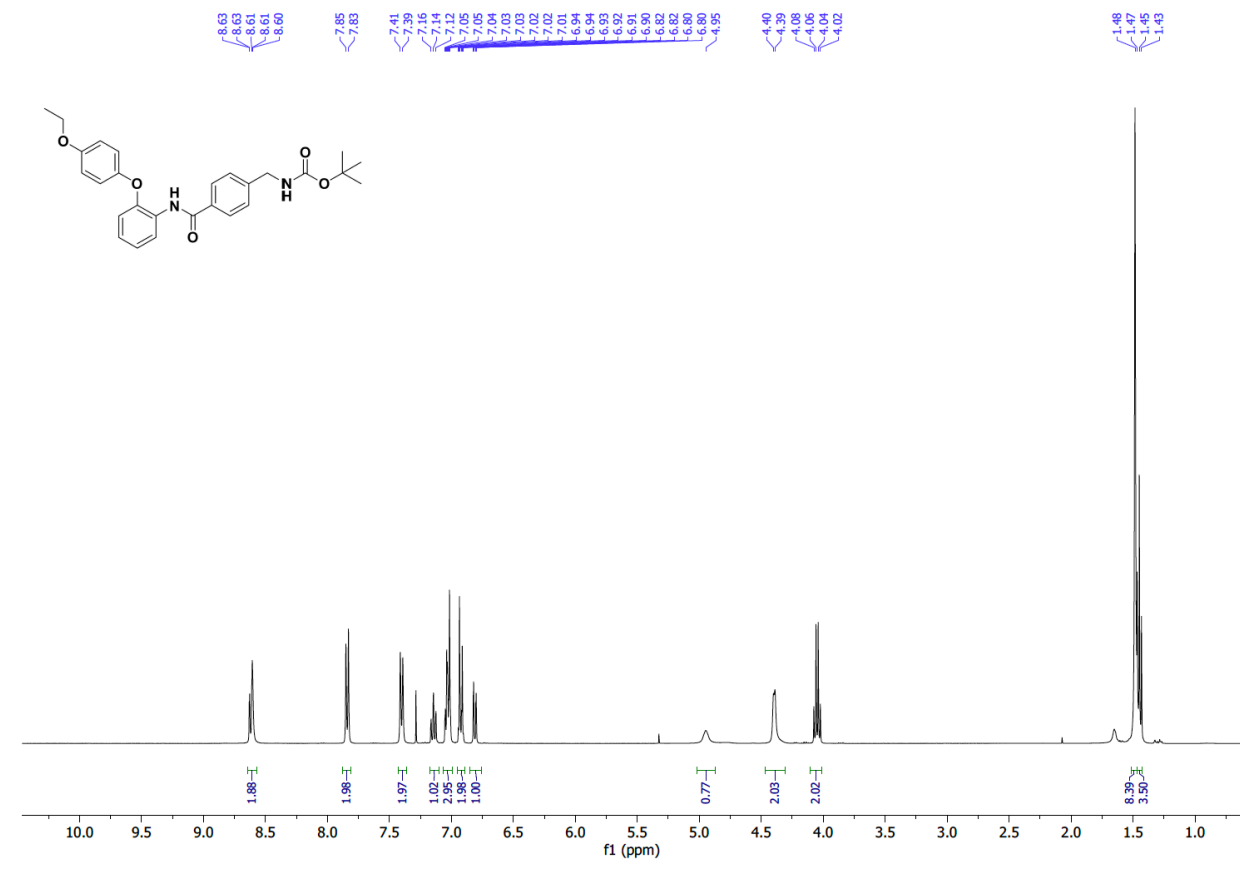

# N-(2-(4-ethoxyphenoxy)phenyl)-4-(propionamidomethyl)benzamide 1H NMR

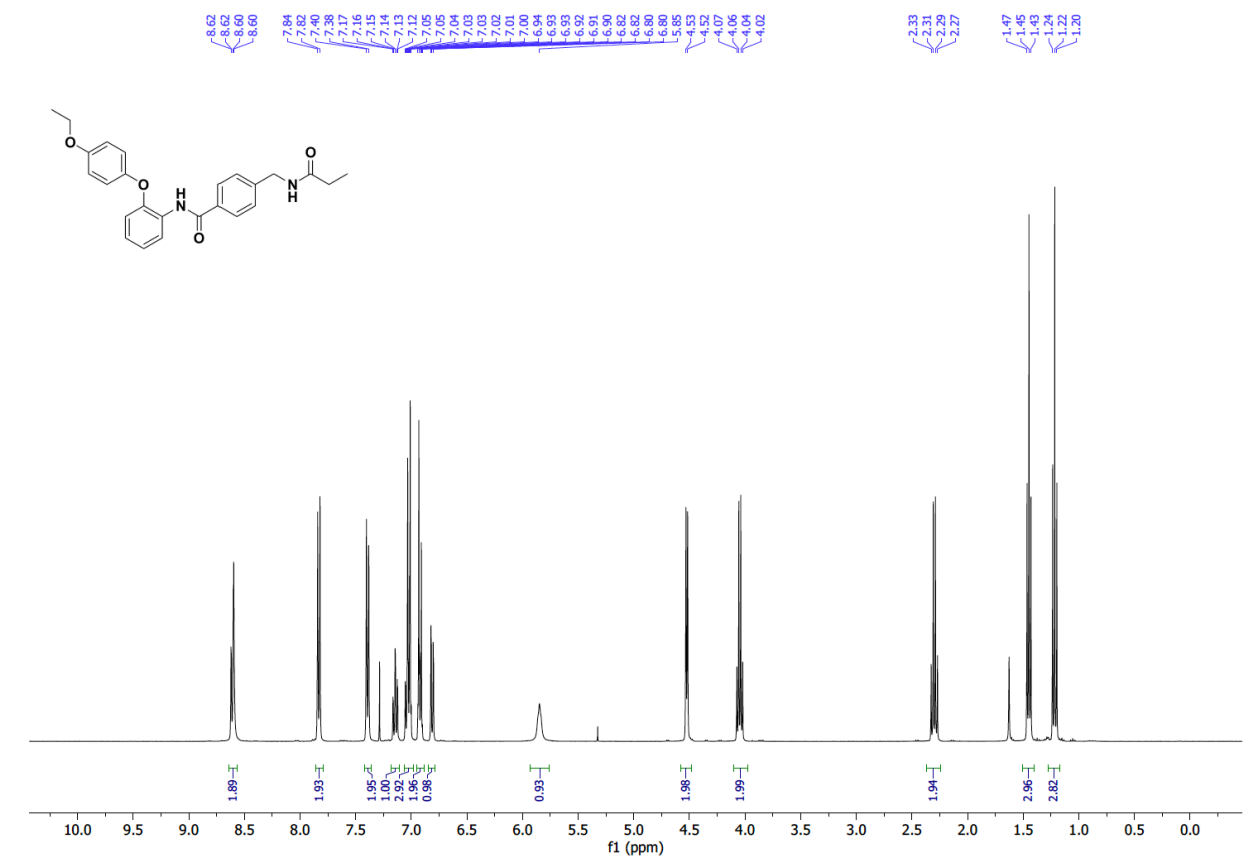

# 13C NMR

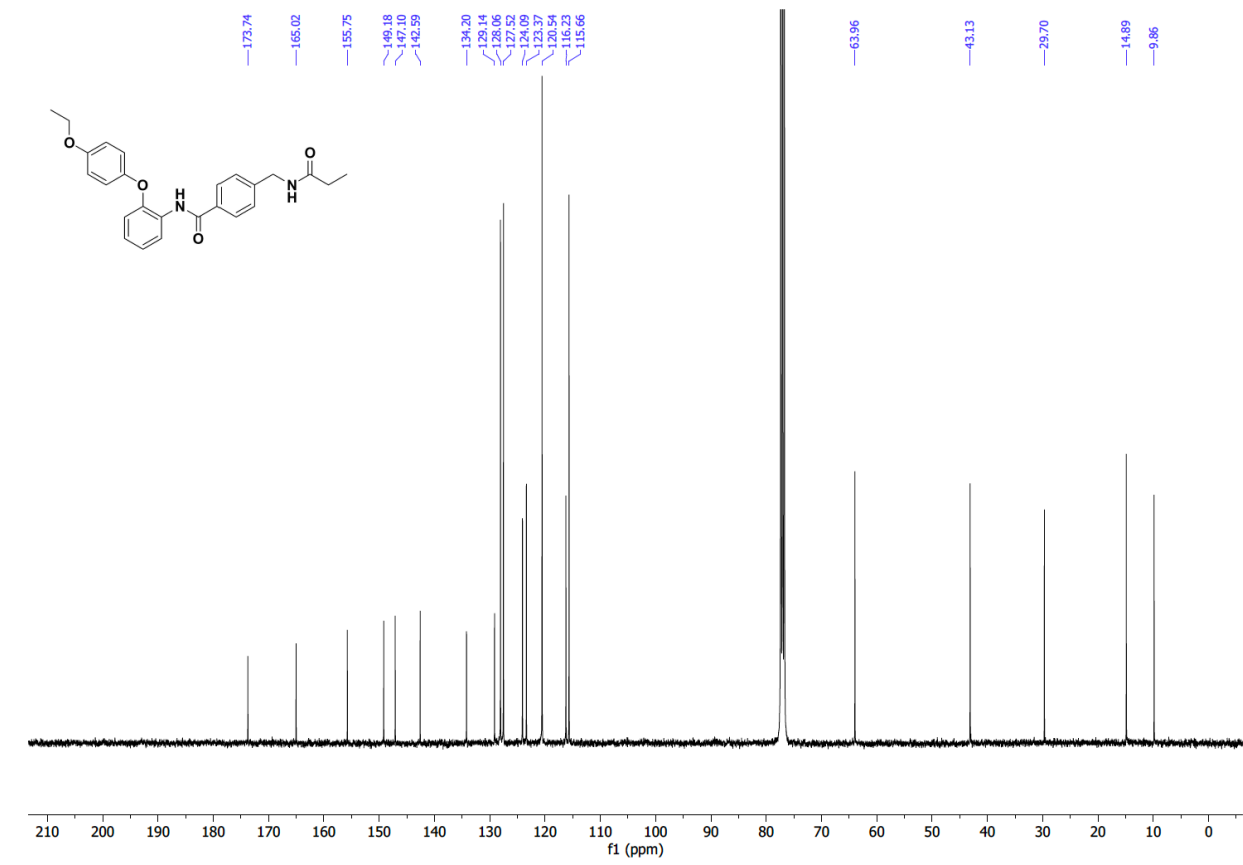



# 4-((2-chloroacetamido)methyl)-N-(2-(4-ethoxyphenoxy)phenyl)benzamide

## <sup>1</sup>H NMR

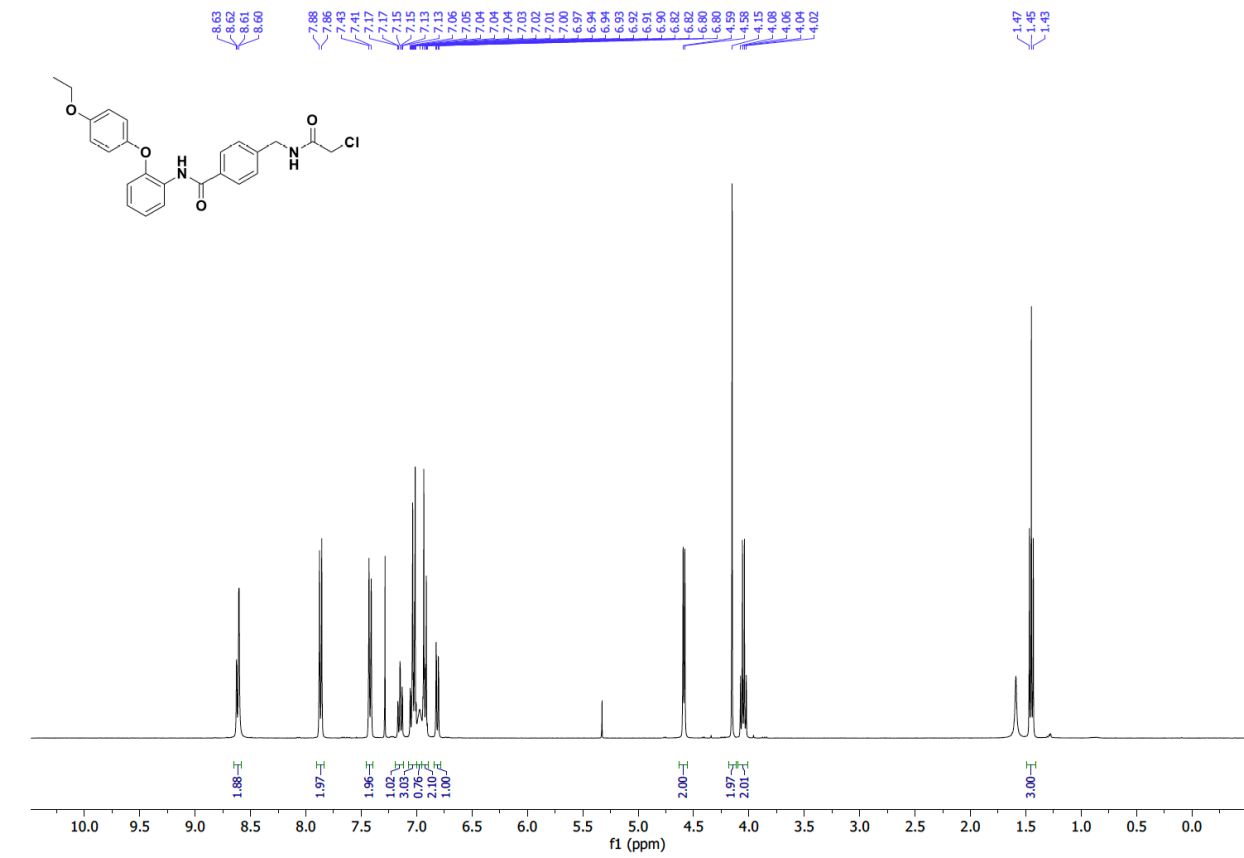

# 13C NMR

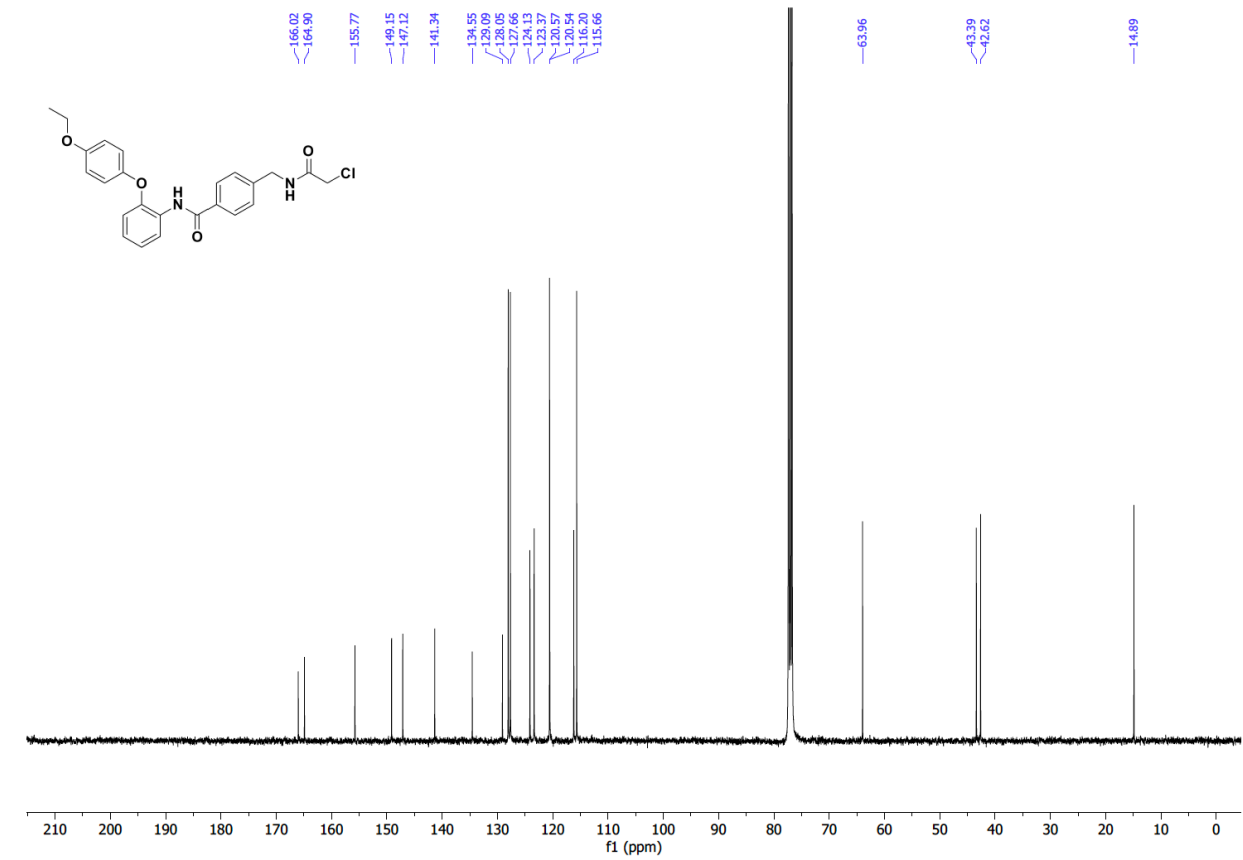

# (E)-4-(but-2-enamidomethyl)-N-(2-(4-ethoxyphenoxy)phenyl)benzamide

## <sup>1</sup>H NMR

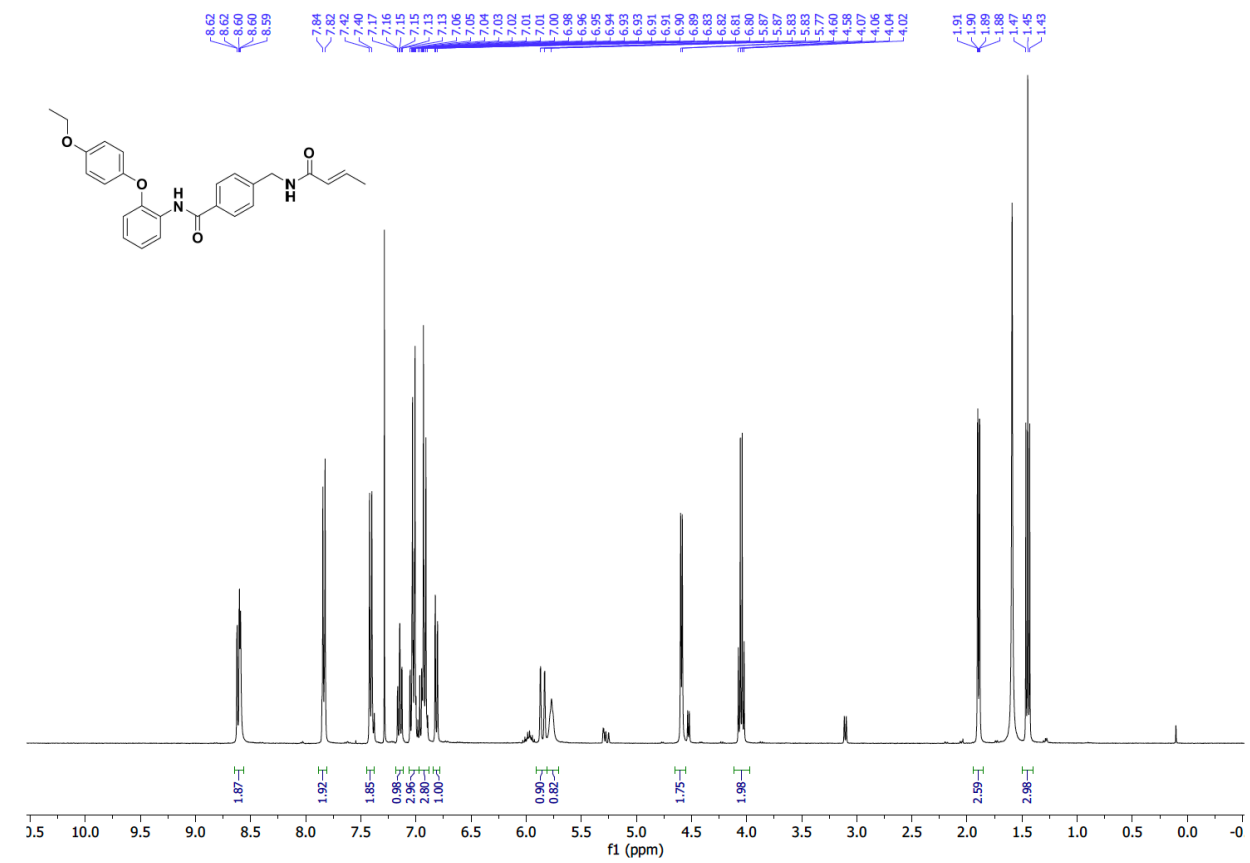

# 13C NMR

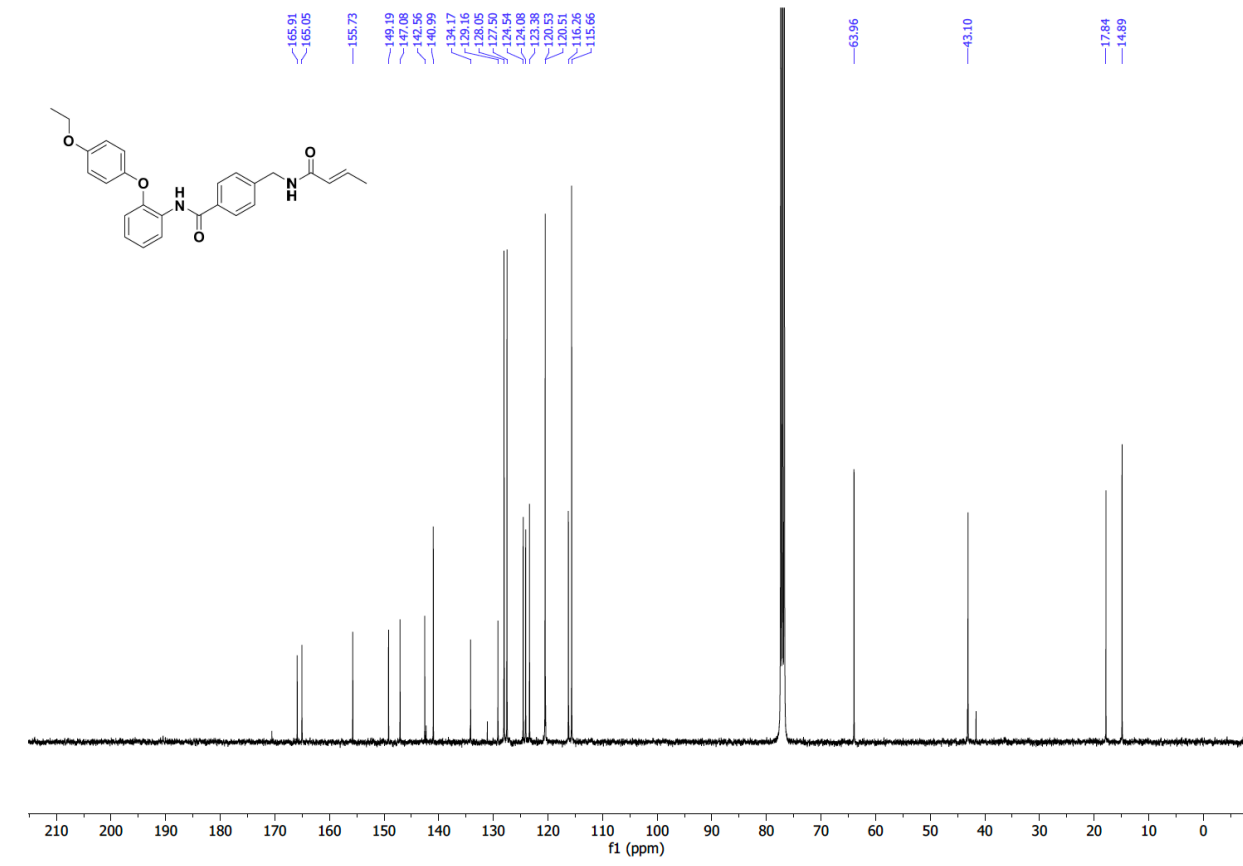

# 4-(acrylamidomethyl)-N-(2-(4-(trifluoromethoxy)phenoxy)phenyl)benzamide

## <sup>1</sup>H NMR

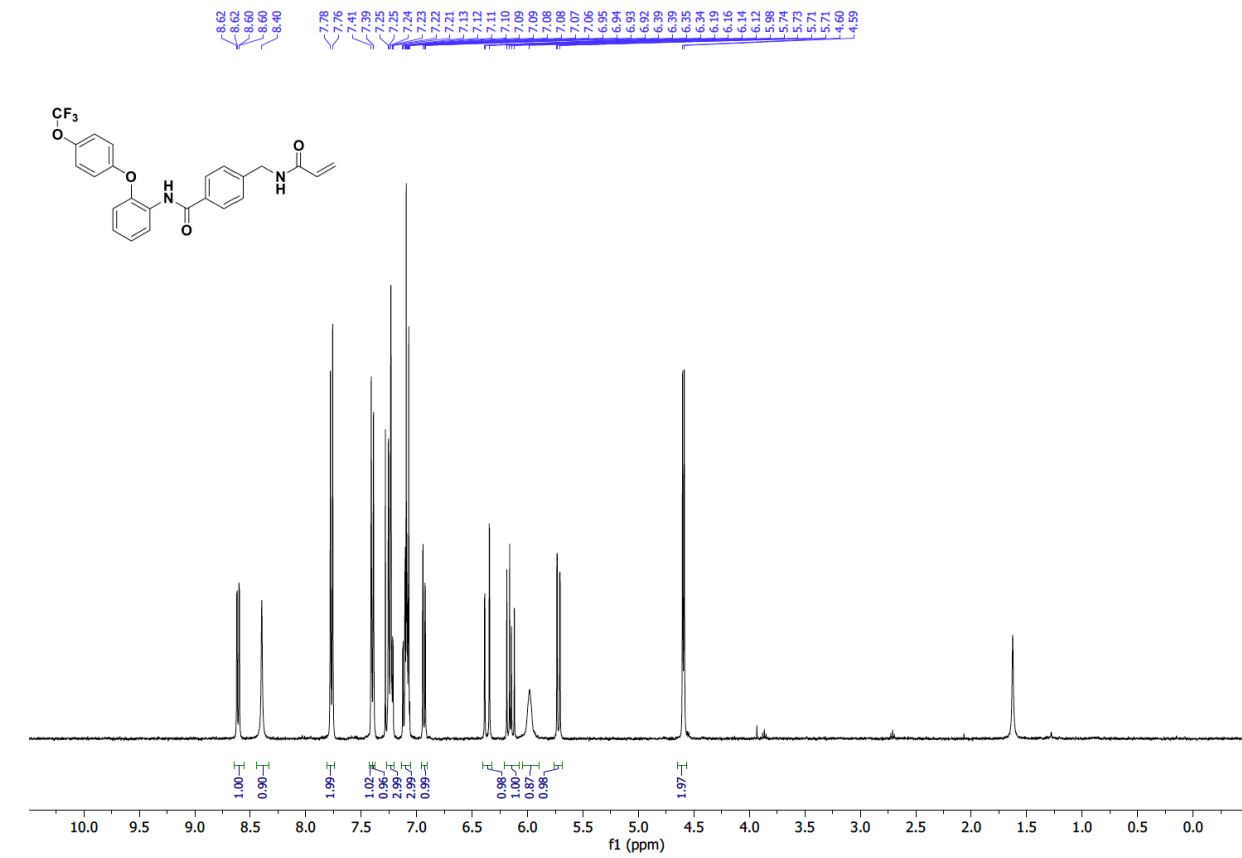

# 13C NMR

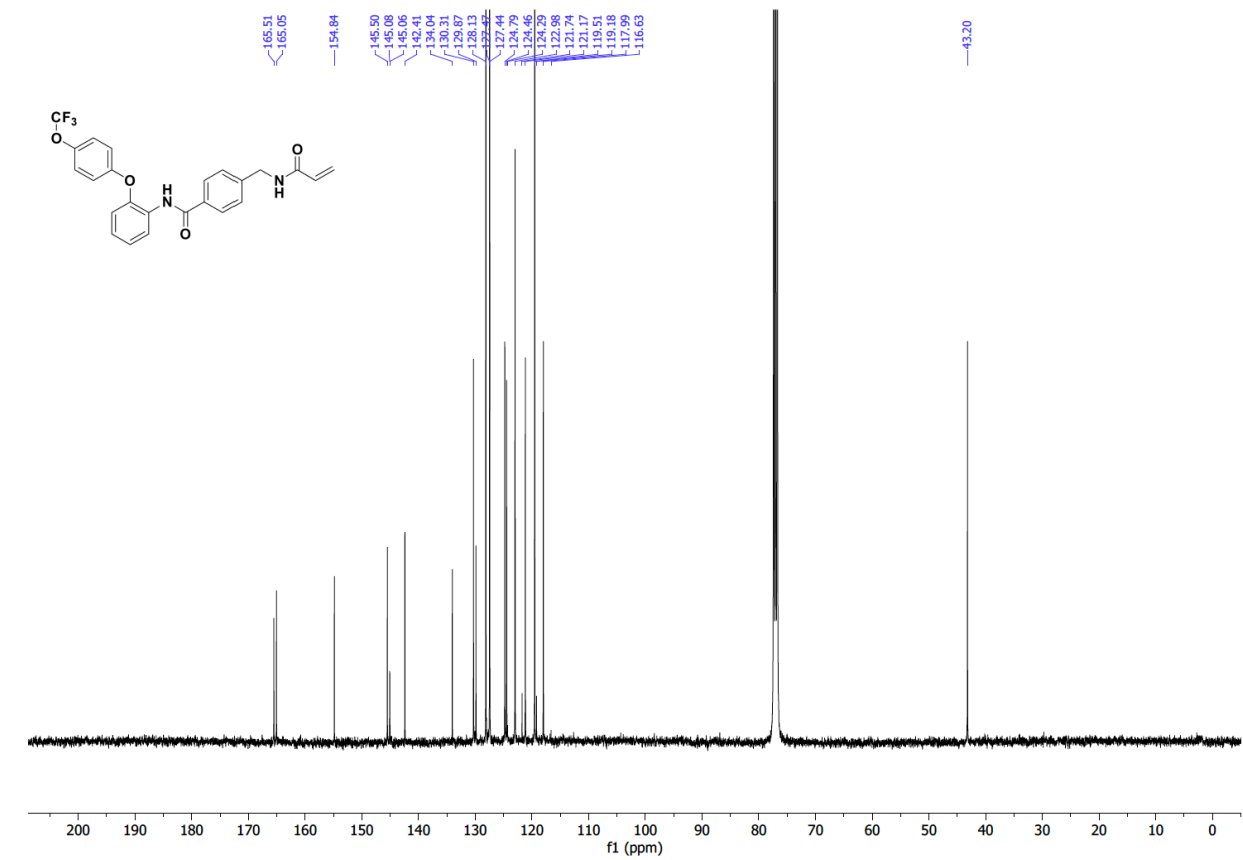

# 19F NMR

-58.25

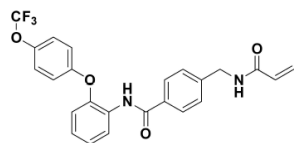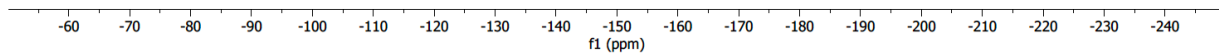

# 4-(acrylamidomethyl)-N-(2-(4-methoxyphenoxy)phenyl)benzamide

## <sup>1</sup>H NMR

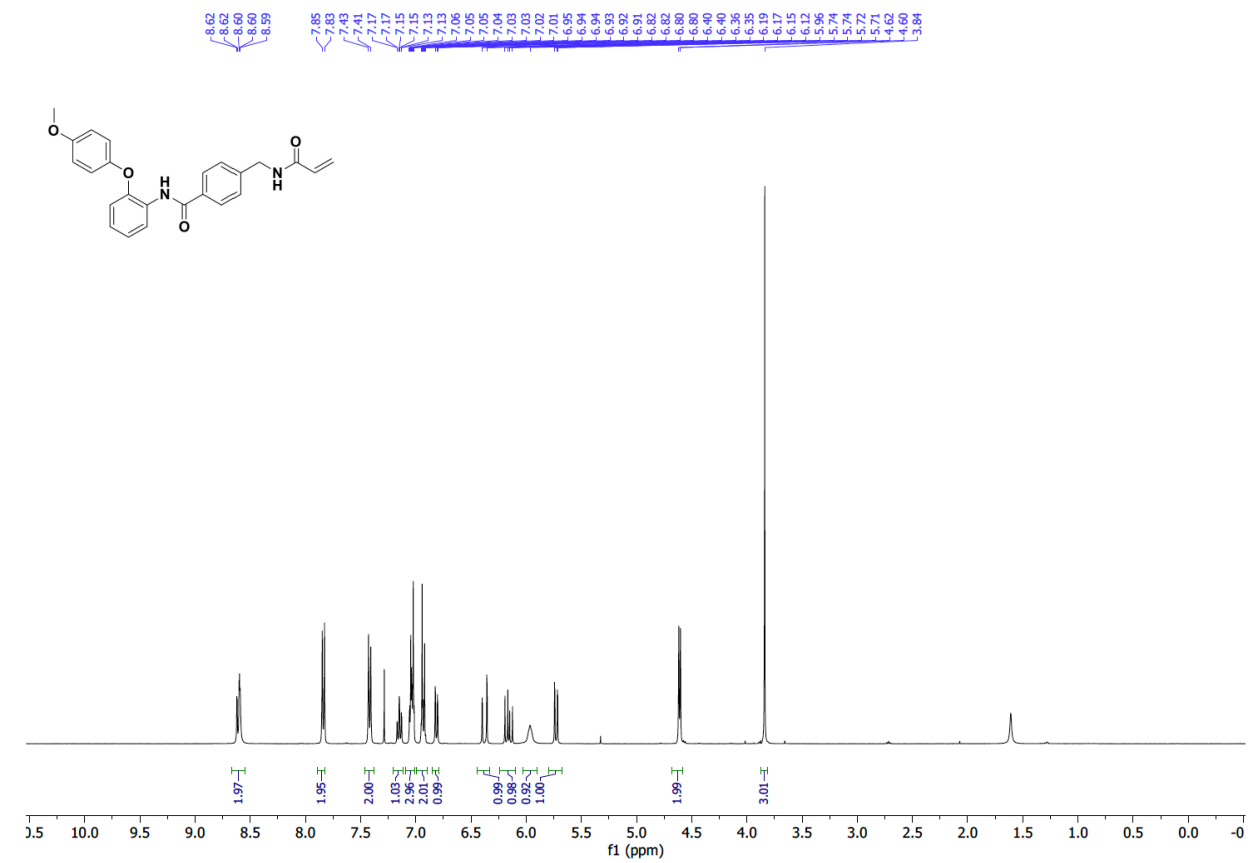



# 13C NMR

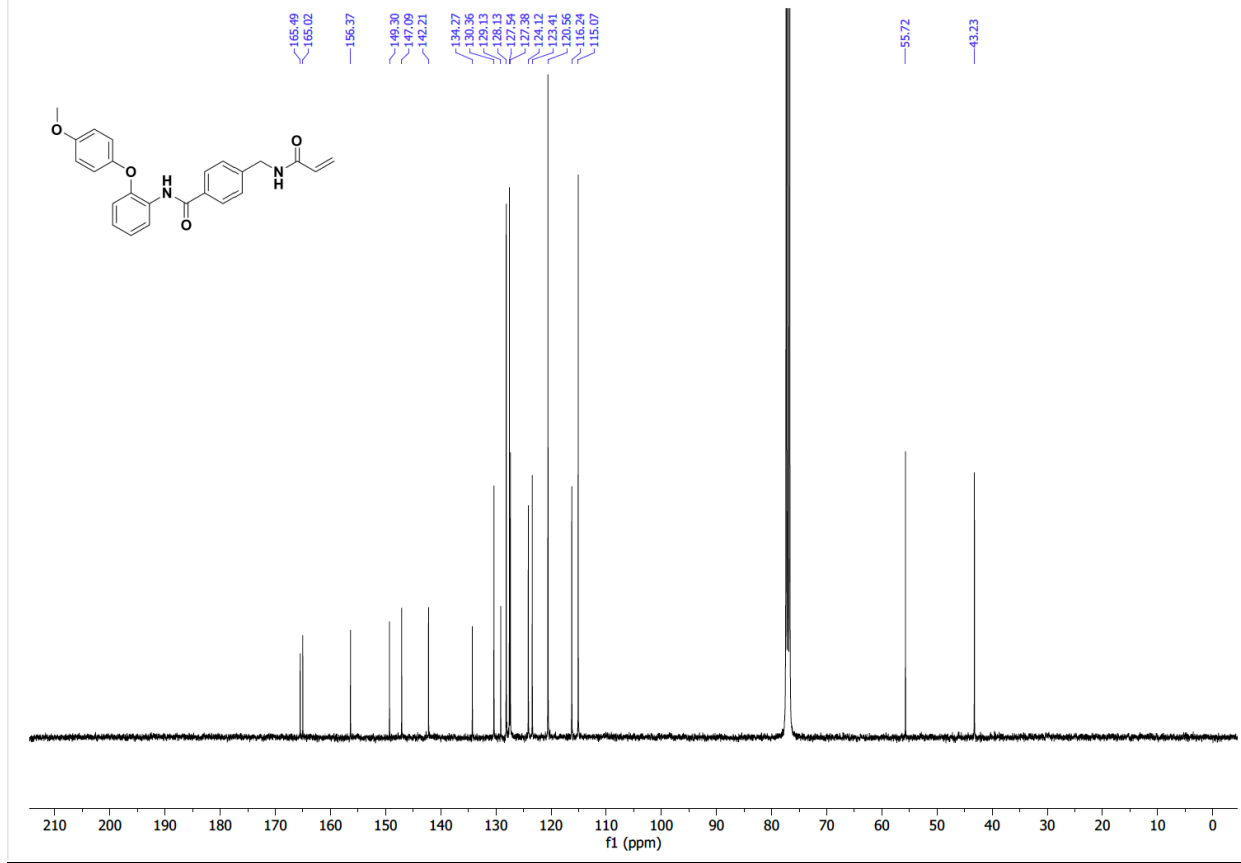

# 4-(acrylamidomethyl)-N-(2-(4-ethoxyphenoxy)-5-fluorophenyl)benzamide

## <sup>1</sup>H NMR

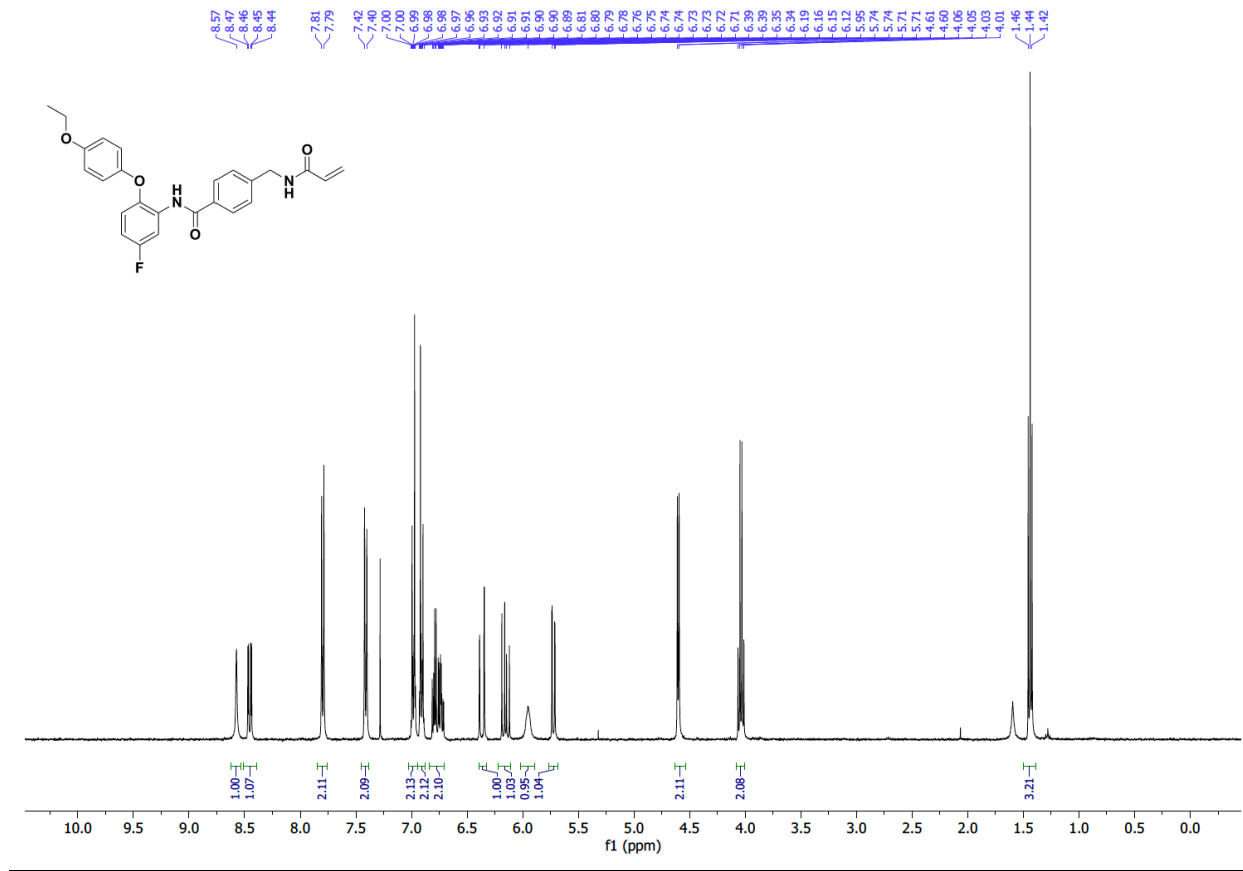

# 13C NMR

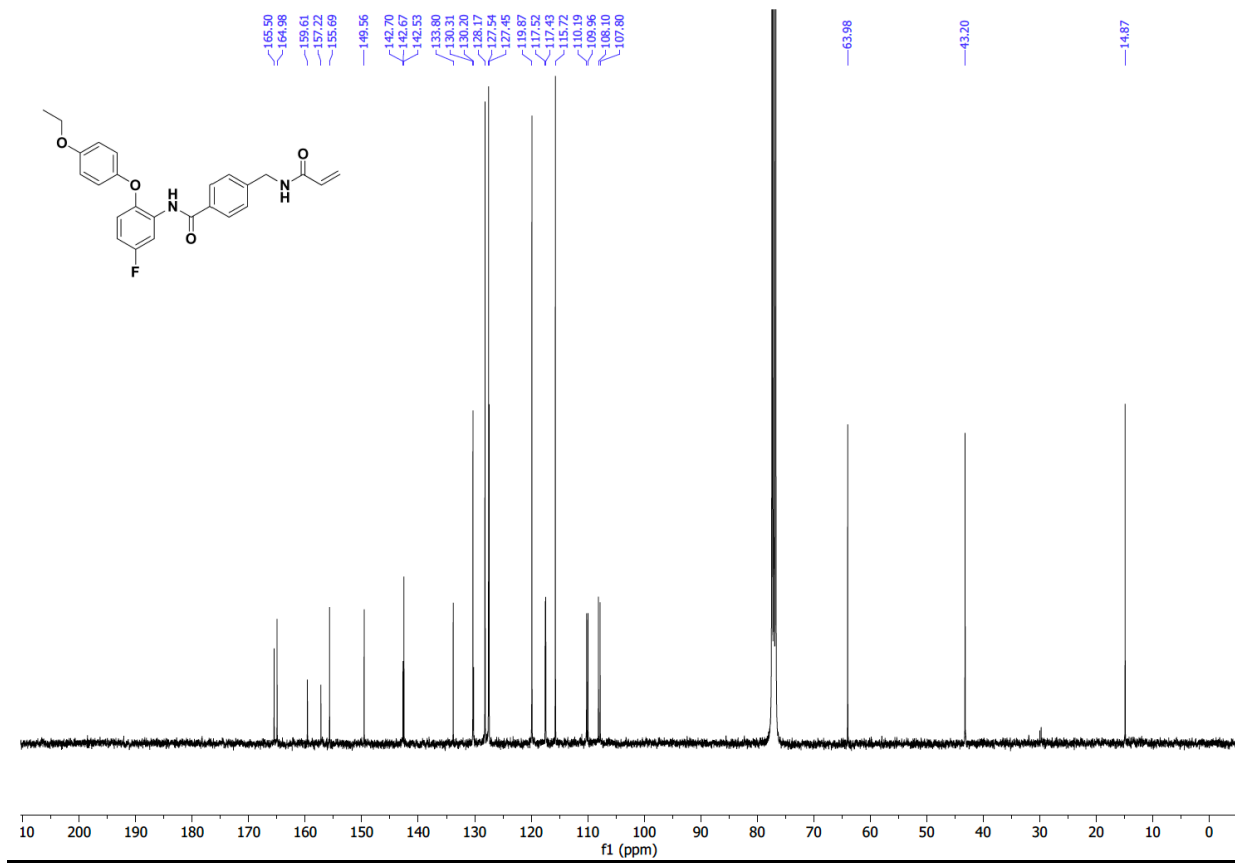

# 19F NMR

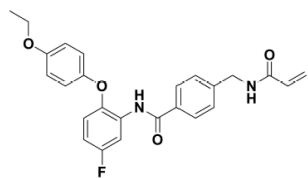

-117.07

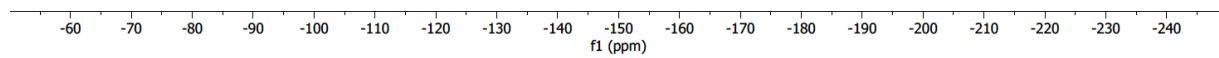

**(E)-N-(2-(4-ethoxyphenoxy)phenyl)-4-((4,4,4-trifluorobut-2-enamido)methyl) benzamide**  
**<sup>1</sup>H NMR**

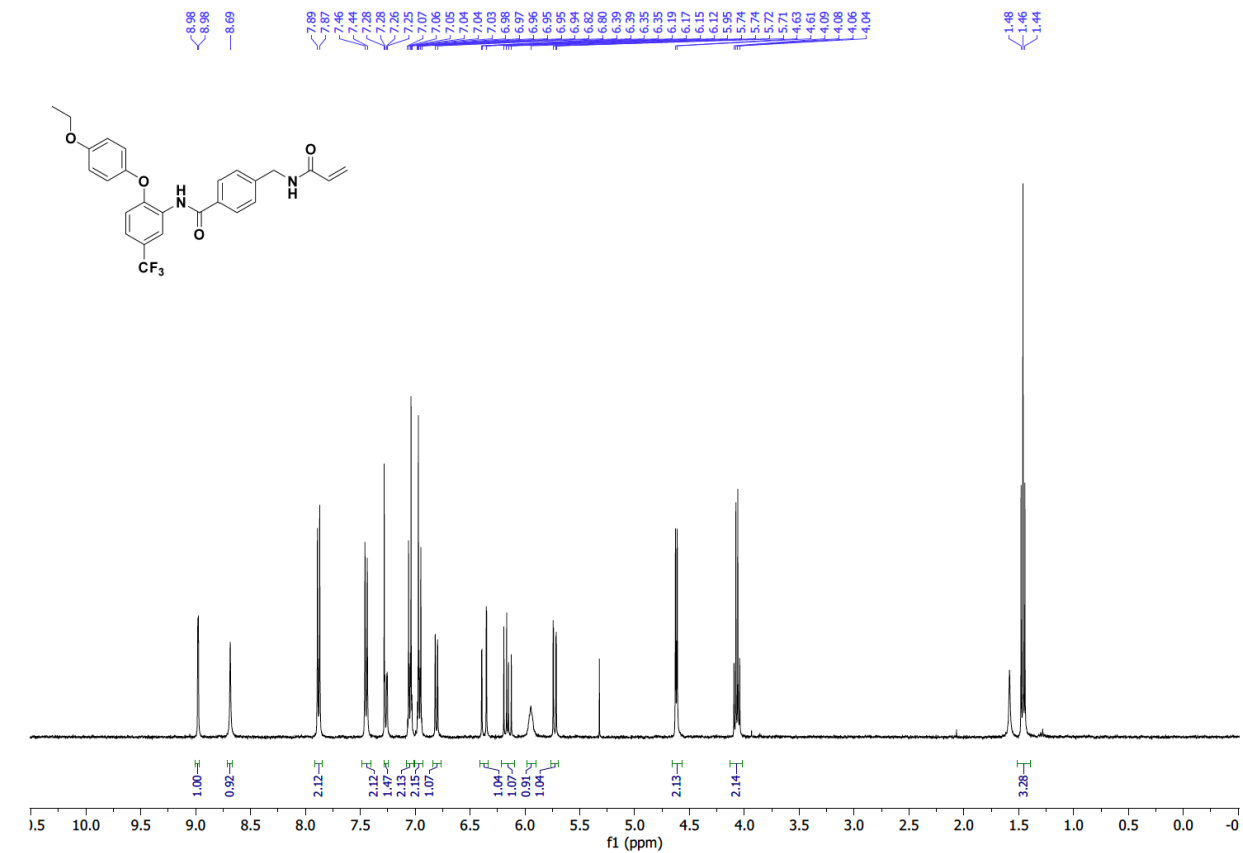

# 13C NMR

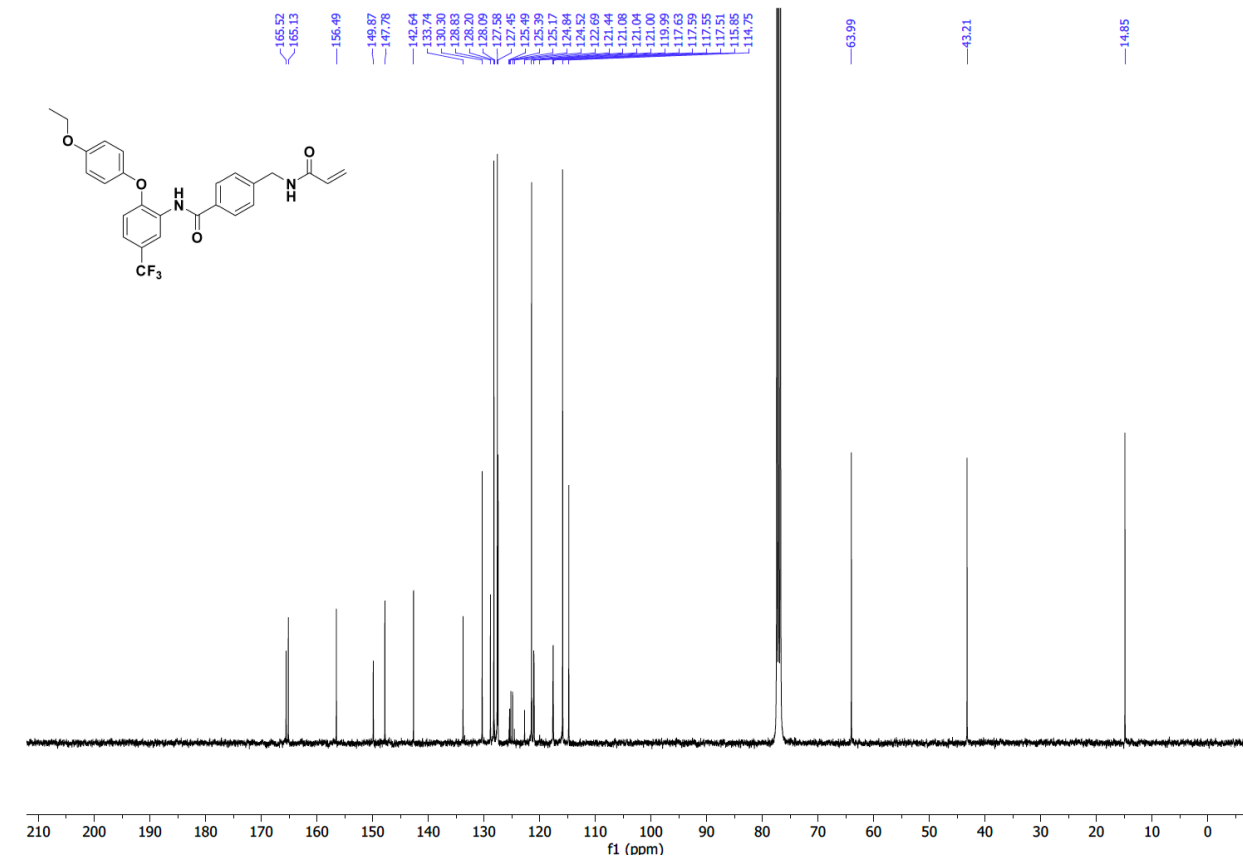

# 19F NMR

61.83

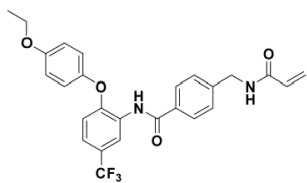

-60 -70 -80 -90 -100 -110 -120 -130 -140 -150 -160 -170 -180 -190 -200 -210 -220 -230 -240  
f1 (ppm)
