# Supplementary material
Source: PubMed Central journal article supplement (PMC7854864)
Supplement: NIHMS1628058-supplement-Supplemental_Information.pdf [file NIHMS1628058-supplement-Supplemental_Information.pdf]

# Supplemental Information

## Discovery of a Functional Covalent Ligand Targeting an Intrinsically Disordered Cysteine Within MYC

Lydia Boike<sup>1,2,\*</sup>, Alexander G. Cioffi<sup>1,2,\*</sup>, Felix C. Majewski<sup>1,2</sup>, Jennifer Co<sup>1,2</sup>,  
Nathaniel J. Henning<sup>1,2</sup>, Michael D. Jones, Gang Liu<sup>2,3</sup>, Jeffrey M. McKenna<sup>2,3</sup>, John A. Tallarico<sup>2,3</sup>,  
Markus Schirle<sup>2,3</sup>, and Daniel K. Nomura<sup>1,2,4,5,6,#</sup>

<sup>1</sup> Department of Chemistry, University of California, Berkeley, Berkeley, CA 94720 USA

<sup>2</sup> Novartis-Berkeley Center for Proteomics and Chemistry Technologies

<sup>3</sup> Novartis Institutes for BioMedical Research, Cambridge, MA 02139 USA

<sup>4</sup> Department of Molecular and Cell Biology, University of California, Berkeley, Berkeley, CA 94720 USA

<sup>5</sup> Department of Nutritional Sciences and Toxicology, University of California, Berkeley, Berkeley, CA 94720  
USA

<sup>6</sup> Innovative Genomics Institute, Berkeley, CA 94720 USA

\* these authors contributed equally to this work

#correspondence to [dnomura@berkeley.edu](mailto:dnomura@berkeley.edu)

**Table S4. Related to Figure 4. Structure-Activity Relationships of EN4 Analogs.**

| <b>Compound</b>                                                                     | <b>EC50 (<math>\mu</math>M)</b> | <b>Compound</b>                                                                     | <b>EC50 (<math>\mu</math>M)</b> |
|-------------------------------------------------------------------------------------|---------------------------------|-------------------------------------------------------------------------------------|---------------------------------|
| 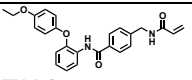   | 12.5                            |    | 5.0                             |
| <b>EN4</b>                                                                          |                                 | <b>EN4-12</b>                                                                       |                                 |
|    | >50                             |    | >50                             |
| <b>EN4-1</b>                                                                        |                                 | <b>EN4-13</b>                                                                       |                                 |
|    | 1.7                             |    | >50                             |
| <b>EN4-2</b>                                                                        |                                 | <b>EN4-14</b>                                                                       |                                 |
|    | >50                             |    | >50                             |
| <b>EN4-3</b>                                                                        |                                 | <b>EN4-15</b>                                                                       |                                 |
|    | 13.0                            |    | >50                             |
| <b>EN4-4</b>                                                                        |                                 | <b>EN4-16</b>                                                                       |                                 |
|    | 2.1                             |    | >50                             |
| <b>EN4-5</b>                                                                        |                                 | <b>EN4-17</b>                                                                       |                                 |
|   | >50                             |   | 2.9                             |
| <b>EN4-6</b>                                                                        |                                 | <b>EN4-18</b>                                                                       |                                 |
|  | 2.2                             |  | 6.3                             |
| <b>EN4-7</b>                                                                        |                                 | <b>EN4-alkyne-1</b>                                                                 |                                 |
|  | 11.9                            |  | 16.4                            |
| <b>EN4-8</b>                                                                        |                                 | <b>EN4-alkyne-2</b>                                                                 |                                 |
|  | 10.4                            |  | 7.8                             |
| <b>EN4-9</b>                                                                        |                                 | <b>EN4-alkyne-3</b>                                                                 |                                 |
|  | >50                             |  | 1.4                             |
| <b>EN4-10</b>                                                                       |                                 | <b>EN4-alkyne-4</b>                                                                 |                                 |
|  | 11.3                            |                                                                                     |                                 |
| <b>EN4-11</b>                                                                       |                                 |                                                                                     |                                 |

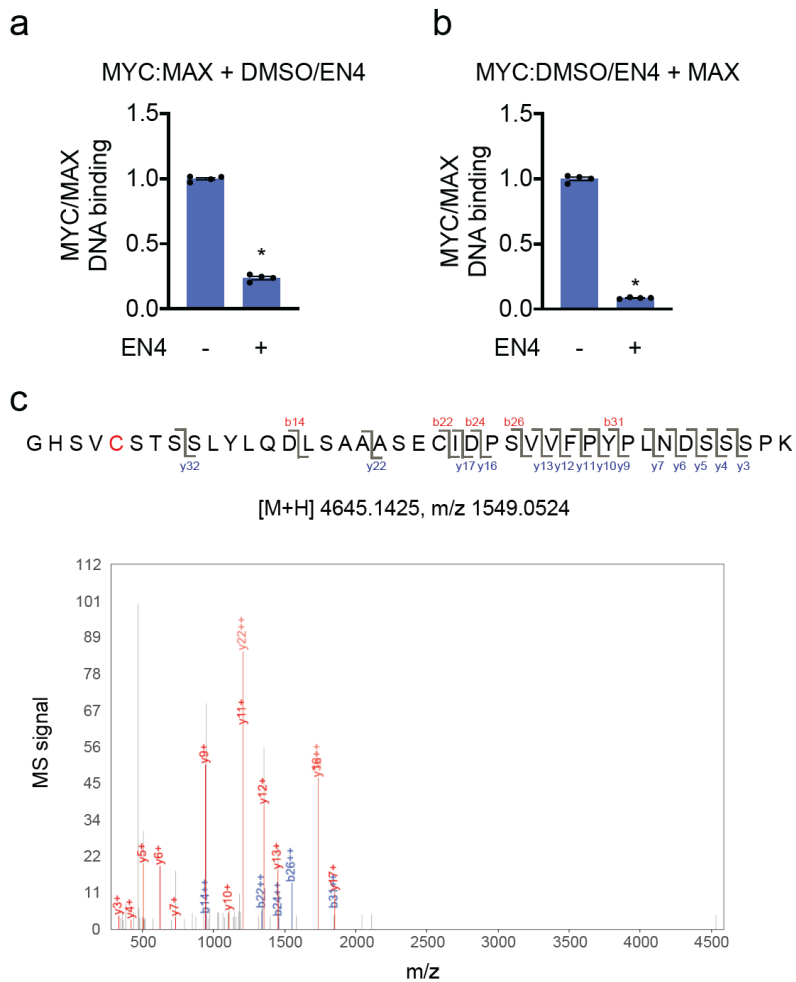

**Figure S1. Related to Figure 1 and Figure 2. Characterization of EN4 inhibition of c-MYC/MAX DNA binding and interaction of EN4 with c-MYC.** (a) Pure human c-MYC and MAX protein (0.2  $\mu$ g each) were pre-incubated for 30 min at 37  $^{\circ}$ C before addition of DMSO vehicle or EN4 (50  $\mu$ M) for 30 min at 37  $^{\circ}$ C prior to assessing DNA binding of the MYC/MAX complex to the E-box DNA consensus sequence. (b) Pure c-MYC (0.2  $\mu$ g) was pre-incubated with DMSO vehicle or EN4 (50  $\mu$ M) for 30 min at 37  $^{\circ}$ C prior to adding MAX (0.2  $\mu$ g) for 30 min at 37  $^{\circ}$ C prior to assessing DNA binding of the MYC/MAX complex to the E-box DNA consensus sequence. (c) MS/MS analysis of EN4 adduct on MYC C171. Pure human full-length MYC was incubated with EN4 (50  $\mu$ M) for 30 min. MYC was then subjected to tryptic digestion and tryptic digests were analyzed by LC-MS/MS. Shown is the EN4 adduct on C171 on a fully tryptic peptide of c-MYC. Data in (a, b) are shown as individual replicate values and average  $\pm$  sem, n=4 biologically independent samples/group. Statistical significance was calculated with unpaired two-tailed Student's t-tests and is expressed as \*p<0.05 compared to vehicle-treated controls.

```

sp|P05412|JUN_HUMAN      -----MTAKMETTFYDDALNASFLPSESGPYGYS---NPKILKQSM      38
sp|P01106|MYC_HUMAN     -----MPLNVSFNTNRNYDLDYDSVQPYFYCDEE-ENFYQQQQQSELQPPAPSEDIWKKFE      54
sp|P04198|MYCN_HUMAN    MPSCSTSTMPGMICKNPDLDFSLQPCFYDE--DDFYFGG----PDSTPPGEDIWKKFE      54
sp|P12524|MYCL_HUMAN    -----MDYDSYQHYFYDYDCGEDFY-----RSTAPSEDIWKKFE      34
                          . : ** . * . * * :

sp|P05412|JUN_HUMAN     -----TLNLADPVGSLKPHLRKNSDLLTSPDVGLLKLASPELERLIIQSSN      85
sp|P01106|MYC_HUMAN     LLPTPPLSPRRSGLCSPSYVA-VTPFSLRGN-----DGGGGSFSTADQLEMVTELLG      107
sp|P04198|MYCN_HUMAN    LLPTPPLSPSRGFAEHSSEPPSWVTEMLL-----ENELWG      89
sp|P12524|MYCL_HUMAN    LVPSPPTSPPWGLGPGAGDPAPGIG-----PPEPWP      65
                          . :

sp|P05412|JUN_HUMAN     GHITTTPTPTQFLPK-----NVTDEQEGFAEGFV-----RALAELHSQNTLPSVTS      132
sp|P01106|MYC_HUMAN     GDM-VNQ---SFIKDPDDETFIKNII-IQDCMWSGFSAAAKLVSEKLASYQAARKDSGSP      162
sp|P04198|MYCN_HUMAN    SPA-EED---AFGLGGLGLTPNPVI-IQDCMWSGFSAREKLERAVSEKLQHGRRPPTAG      144
sp|P12524|MYCL_HUMAN    GGC-TGDEAESRGRHSGWGRNYASII-RRDCMWSGFSARERLERAVSDRLAPGAPRGNPP      123
                          . : : : .*

sp|P05412|JUN_HUMAN     AAQPVNGAGMVAPAVASVAGSGSGGFSASL---H-----SEPPVY-----      170
sp|P01106|MYC_HUMAN     N-----PARGHSV-----CSTSSLYLQDLASAAASECIDPSVVFYPLNDSSSPK      206
sp|P04198|MYCN_HUMAN    STAQSPGAGAASPAGRGHGAAGAGRAGAALPAELAHPAAECDPAVVFPPVKNREPAP      204
sp|P12524|MYCL_HUMAN    KASA-----APDCT-----      132

sp|P05412|JUN_HUMAN     --A---NLSNFPNGALS--SGGGAPSYGAAGLAFPA-----      199
sp|P01106|MYC_HUMAN     SCASQD-SSAFSPSSDSLSTESSPQGSPE-----PLVLHEE-TPPT      247
sp|P04198|MYCN_HUMAN    VPAAPASAPAAGPAVAS--GAGIAAPAGAPGVAPPRPGRQTSGGDHKALSTSGEDTLD      262
sp|P12524|MYCL_HUMAN    -----PSLE-----AGNPAPAAPCPLGE-----PKTQACSGS-----      159
                          * . *

sp|P05412|JUN_HUMAN     -----QPQQQQQPPHHLQ      213
sp|P01106|MYC_HUMAN     TSSDSEEEQEDEEEDVVSVEKQRQAPGKRSESGSPS-----AGGHSKPPHSPLVLKR      299
sp|P04198|MYCN_HUMAN    SDEDEDDEEEDDEEEDVVTVEKRRSSNTKAVTFTTITVRPKNAALGPGRQSSSELI LKR      322
sp|P12524|MYCL_HUMAN    ----ESPDSENEEDVVTVEKQRQLGIRKPVV---ITVRAD--PLDPCM-----KHF      203

sp|P05412|JUN_HUMAN     QMPVQ-----HPRLQA-----LKE-----EP-QTVPE      234
sp|P01106|MYC_HUMAN     CHVS-THQHNYAAPSTRKDY-----PAAKR-VKL-----DSVR-VLRQ      335
sp|P04198|MYCN_HUMAN    CLPI-HQQHNYAAPSPYVESE-----DAPPQKK-IK-----SEASPRPLKSV      362
sp|P12524|MYCL_HUMAN    HISIHQQQHNYAARFPPESCSQEEASERGPQEEVLERDAAGEKEDEEEDIEVSPPPVESE      263
                          . :

sp|P05412|JUN_HUMAN     MPGETPPLSPIDMESQERIKAEKRMRNRRIAASKCRKR-----KLER      276
sp|P01106|MYC_HUMAN     ISNNRKCTSPRSSDTEENVKRRTHNVLERQRRNELKRSFFALRDQIPELENNEKAPKVVI      395
sp|P04198|MYCN_HUMAN    IPPKAKLSPRNSDSEDSERRRNHNILERQRRNDRSSFLTLRDHVPPELVKNEKAAKVVI      422
sp|P12524|MYCL_HUMAN    A-AQSCHPKPVSDTEDVTRKRNHNFLERKRRNDRSRLALRDQVPTLASCSPKPVVI      322
                          : . * . : : : : . . . : * . . :

sp|P05412|JUN_HUMAN     IARLEEKVKTlKAQNSELASTANMLREQVAQLKQKVMNHVNSGCQLMLTQQLQTF      331
sp|P01106|MYC_HUMAN     LKKATAYILSVQAEQKLISEEDLLRKRREQLKHKLE-QLRNCA-----      439
sp|P04198|MYCN_HUMAN    LKKATEYVHSLQAEHQLLLEKEKQLARQQQLLKKIE-HARTC-----      464
sp|P12524|MYCL_HUMAN    LSKALEYLQALVGAEKRMATEKRLRCRQQQLQKRIA-YLTGY-----      364
                          : : : : : : * : : ** : :

```

**Figure S2. Related to Figure 2. Sequence alignment of human JUN, c-MYC, N-MYC and L-MYC.** Shown is a sequence alignment of human JUN, c-MYC, N-MYC, and L-MYC using CLUSTAL O (1.2.4). Highlighted in yellow C171 on c-MYC, which is not conserved between N-MYC and L-MYC. Highlighted in green is C99 of JUN and C117 of c-MYC.

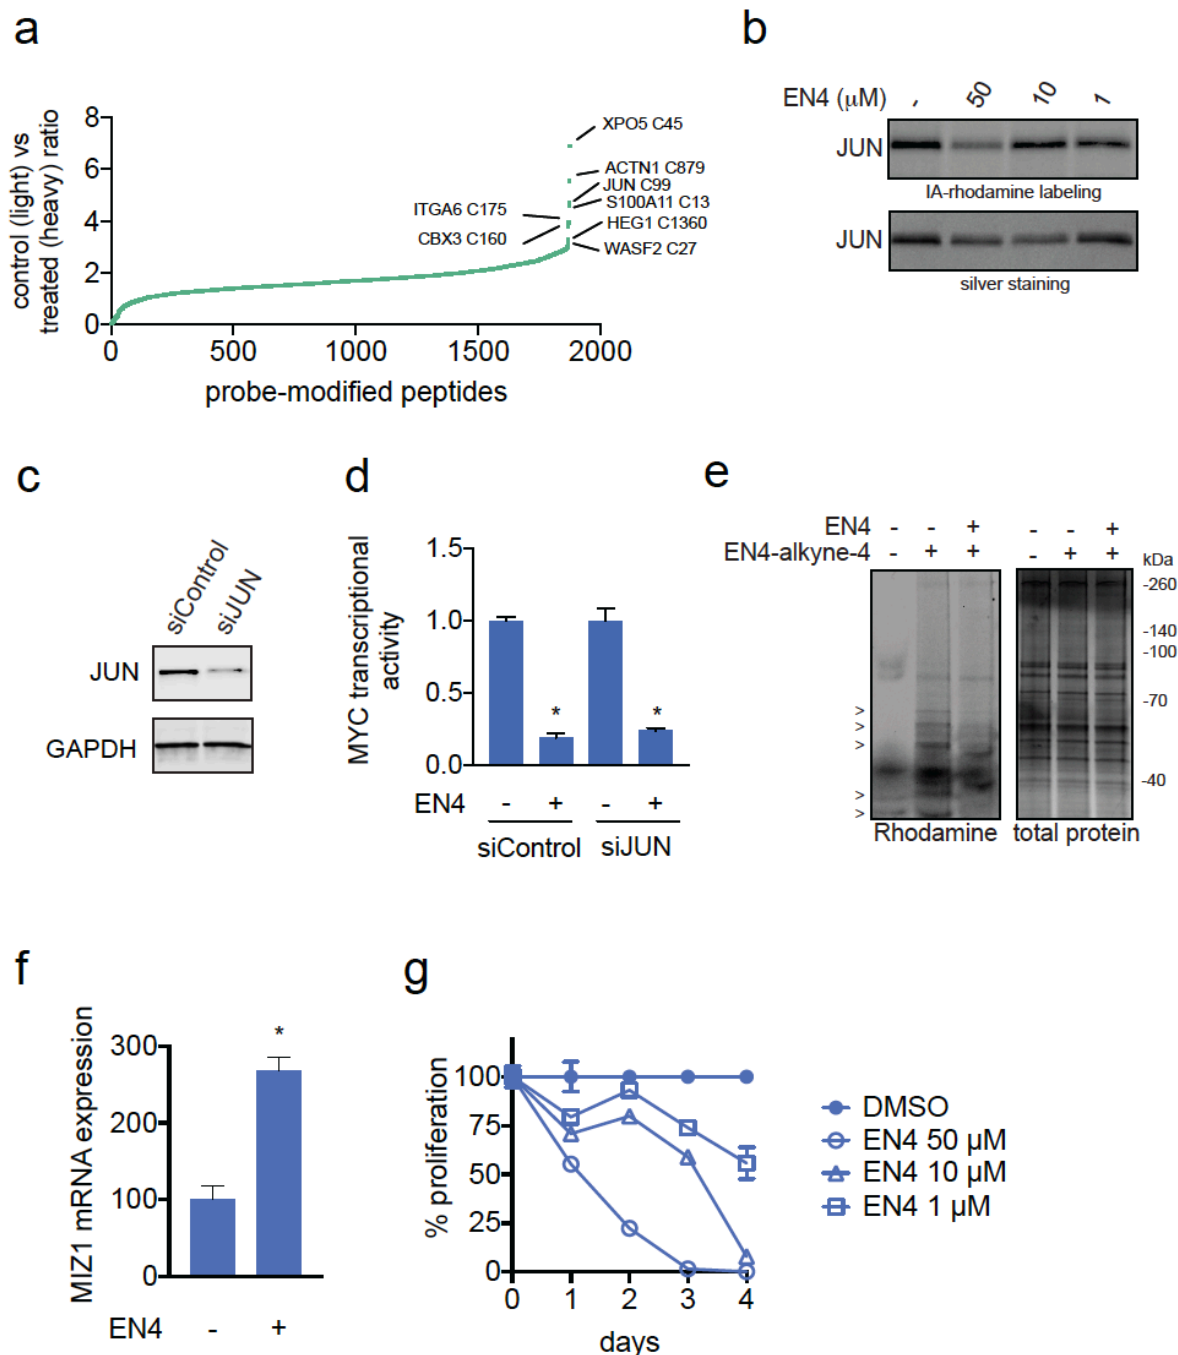

**Figure S3. Related to Figures 3 and 4. Characterization of EN4 in cells.** (a) isoTOP-ABPP analysis of EN4 in 231MFP breast cancer cells. 231MFP cells were treated with DMSO vehicle or EN4 (50  $\mu\text{M}$ ) for 4 h. Cell lysates were subsequently labeled with IA-alkyne for 1 h, followed by appendage of a TEV protease-cleavable biotin-azide linker bearing isotopically light (for control) or heavy (for EN4-treated) tags by CuAAC. Control and treated proteomes from each replicate were combined in a 1:1 ratio and subjected to avidin-enrichment, digestion by trypsin, and release of probe-modified peptides by TEV protease. Probe-modified peptides were analyzed by LC-LC-MS/MS and light to heavy ratios were quantified. Shown are those ratios with ratios  $>5$  highlighted with the protein designation and cysteine number. Shown are average light/heavy ratios from  $n=3$  biologically independent samples/group. (b) gel-based ABPP of EN4 against pure human JUN. Pure human JUN protein was pre-incubated with DMSO vehicle or EN4 for 30 min prior to labeling of protein with rhodamine-functionalized iodoacetamide (IA-rhodamine) (5  $\mu\text{M}$ ) for 30 min. Proteins were separated by SDS/PAGE and visualized by in-gel fluorescence and protein loading was visualized by silver staining. (c) JUN knockdown in HEK293T cells shown by Western blotting alongside loading control GAPDH in cells transfected with siControl or pooled siJUN oligonucleotides for 48 h. Shown is a representative gel of  $n=3$  biological replicates/group. (d) MYC luciferase reporter activity in HEK293T cells transiently transfected with siControl

versus siJUN oligonucleotides treated with DMSO vehicle or EN4 (10  $\mu$ M) for 24 h. Values are reported relative to vehicle-treated controls in each group. **(e)** EN4-alkyne-4 labeling of 231MFP cells. 231MFP cells were pre-treated with DMSO vehicle or EN4 (50  $\mu$ M) for 2 h prior to treatment with DMSO or EN4-alkyne-4 (1  $\mu$ M) for 4 h. Resulting cell lysates were subjected to CuAAC to append rhodamine-azide to EN4-alkyne-4 labeled proteins. Proteins were separated by SDS/PAGE and visualized by rhodamine fluorescence (left) or for total protein by Simple Blue staining (right). Shown are representative gels from n=3 biological replicates/group. Arrows show EN4-alkyne-4 labeled proteins that are competed by EN4 treatment. **(f)** MIZ1 mRNA expression. 231MFP breast cancer cells were treated with DMSO vehicle or EN4 (50  $\mu$ M) and MIZ1 mRNA expression was assessed by qPCR. **(g)** 231MFP cell proliferation in cells treated with DMSO vehicle or EN4 once per day daily over 4 days, assessed by Hoechst staining. Data normalized to daily DMSO controls are shown. Data shown in **(d, f, g)** are average  $\pm$  sem, n=6 for **(d)**, n=3 for **(f)**, and n=5-6 for **(g)** biologically independent samples/group. Statistical significance was calculated with unpaired two-tailed Student's t-tests and is expressed as \*p<0.05 compared to vehicle-treated controls.

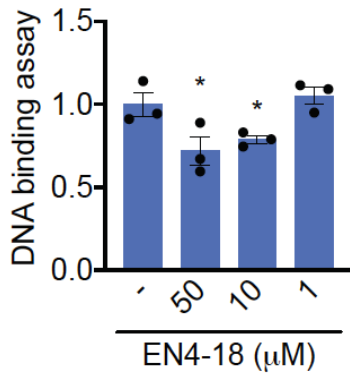

**Figure S4. Related to Figure 4 and Table S4. Characterization of EN4-18 in DNA binding assays.**

Screening a cysteine-reactive covalent ligand library *in vitro* for compounds that would inhibit MYC/MAX binding to its E-box DNA consensus sequence. DMSO vehicle or EN4-18 were pre-incubated with pure human full-length MYC protein for 30 min before direct addition of MAX and then addition to DNA binding plates for 1 h. Data are shown as ratio relative to DMSO vehicle treated controls set to 1. Data shown are average  $\pm$  sem, n=3 biologically independent samples/group. Statistical significance was calculated with unpaired two-tailed Student's t-tests is expressed as \*p<0.05.
